# Supplementary material
Source: PubMed Central journal article supplement (PMC8208645)
Supplement: NIHMS1703206-supplement-Supplemental_Movie.pdf [file NIHMS1703206-supplement-Supplemental_Movie.pdf]

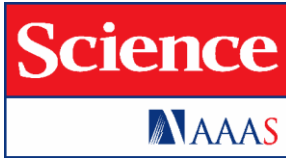

## Supplementary Material for **Targeting a neoantigen derived from a common *TP53* mutation**

Emily Han-Chung Hsiue, Katharine M. Wright, Jacqueline Douglass, Michael S. Hwang, Brian J. Mog, Alexander H. Pearlman, Suman Paul, Sarah R. DiNapoli, Maximilian F. Konig, Qing Wang, Annika Schaefer, Michelle S. Miller, Andrew D. Skora, P. Aitana Azurmendi, Michael B. Murphy, Qiang Liu, Evangeline Watson, Yana Li, Drew M. Pardoll, Chetan Bettegowda, Nickolas Papadopoulos, Kenneth W. Kinzler, Bert Vogelstein\*, Sandra B. Gabelli\*, Shibin Zhou\*

\*Corresponding author. Email: vogelbe@jhmi.edu (B.V.); gabelli@jhmi.edu (S.B.G.); sbzhou@jhmi.edu (S.Z.)

Published 1 March 2021 as *Science* First Release  
DOI: 10.1126/science.abc8697

### **This PDF file includes:**

Figs. S1 to S12  
Tables S1 to S7  
References

**Other Supplementary Material for this manuscript includes the following:**  
(available at [science.sciencemag.org/content/science.abc8697/DC1](https://science.sciencemag.org/content/science.abc8697/DC1))

Movie S1  
MDAR Reproducibility Checklist

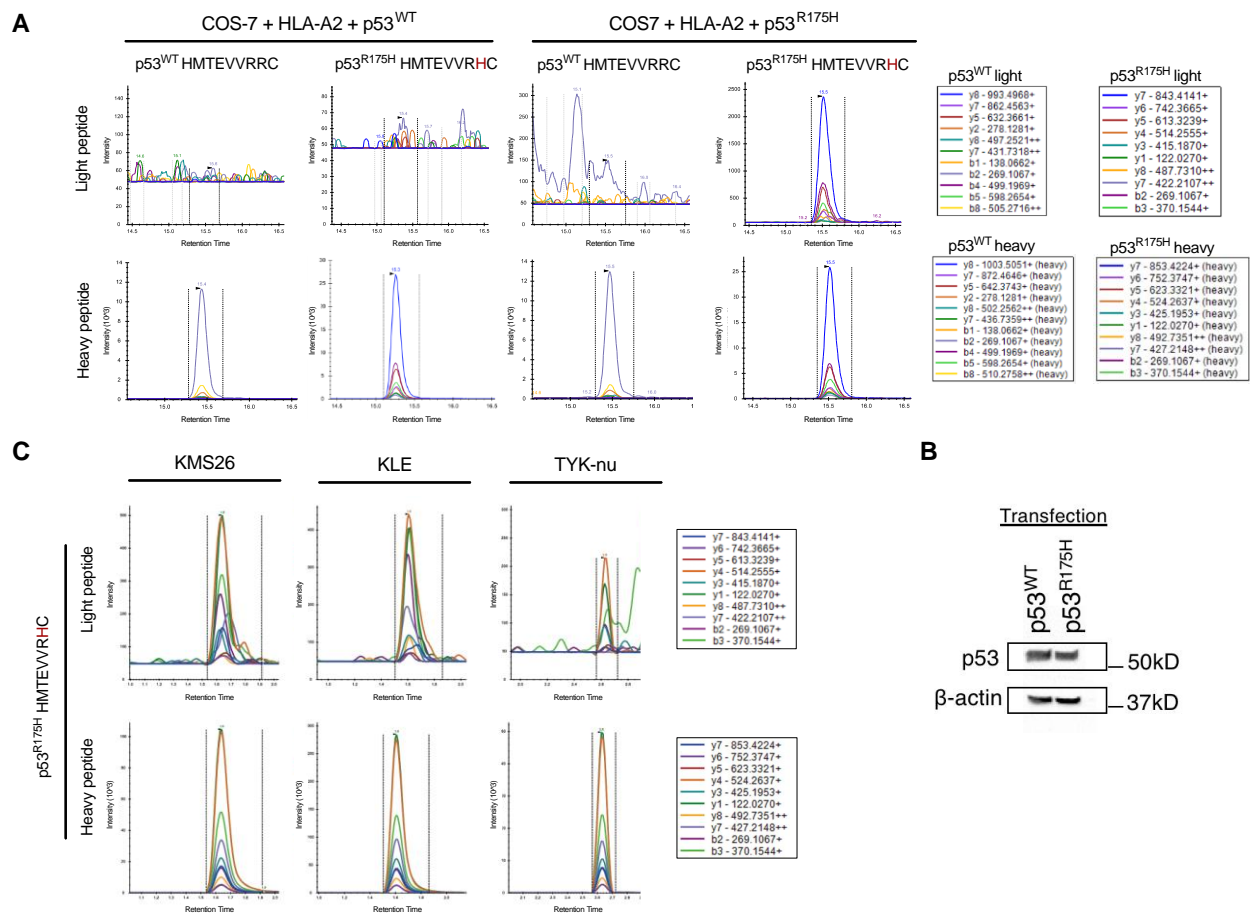

**Fig. S1. Detection and quantification of p53<sup>R175H</sup> peptide in cells.** (A) COS-7 cells transfected with constructs expressing HLA-A\*02:01 and p53<sup>WT</sup> or p53<sup>R175H</sup> were analyzed for the presentation of the p53<sup>WT</sup> HMTEVVRRC or the p53<sup>R175H</sup> HMTEVVRHC peptide. Isotope-labeled peptides were spiked into the assay and served as standards for absolute copy number quantification. Multiple ions (indicated by different colors) fragmented from the target peptide in each sample were measured by mass spectrometry as different SRM transitions, and their m/Z values are listed in the figure. (B) Expression of p53 protein in COS-7 cells transfected with plasmids expressing either full-length p53<sup>WT</sup> or p53<sup>R175H</sup> was assessed by Western blotting with anti-p53 antibody (clone DO-1). (C) Cell lines with endogenous HLA-A\*02:01 and p53<sup>R175H</sup> expression were analyzed for the presentation of p53<sup>R175H</sup> peptide as described in (A).

**A**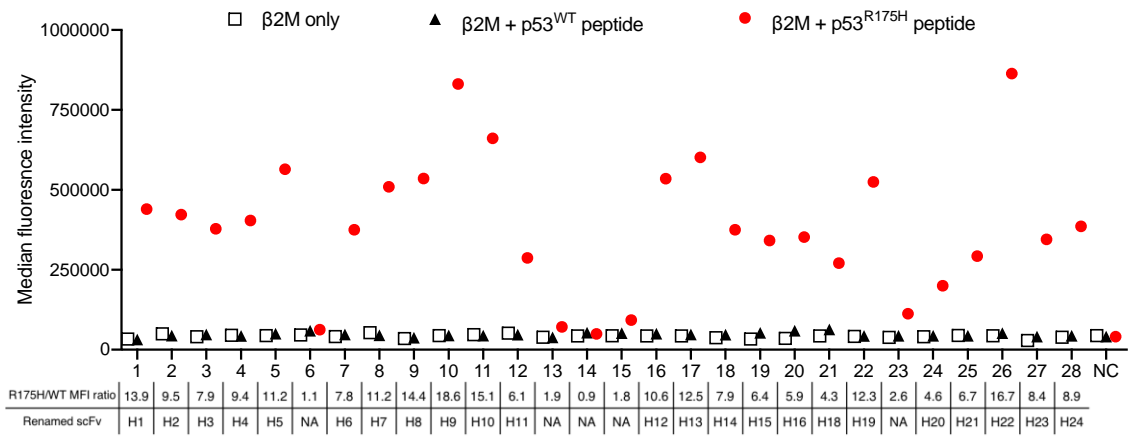p53<sup>R175H</sup>/HLA-A\*02:01 pHLA enriched phage clone**B**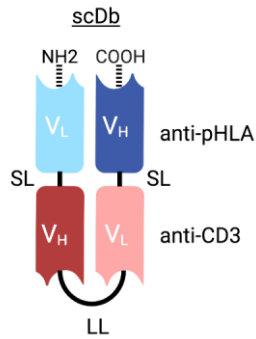**D**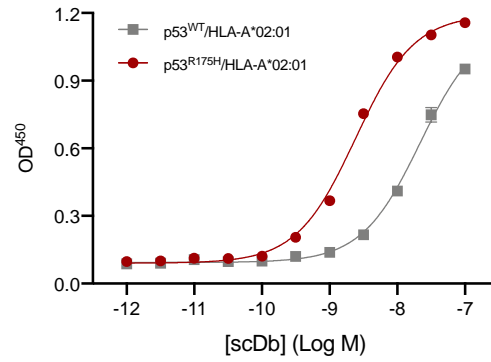**C**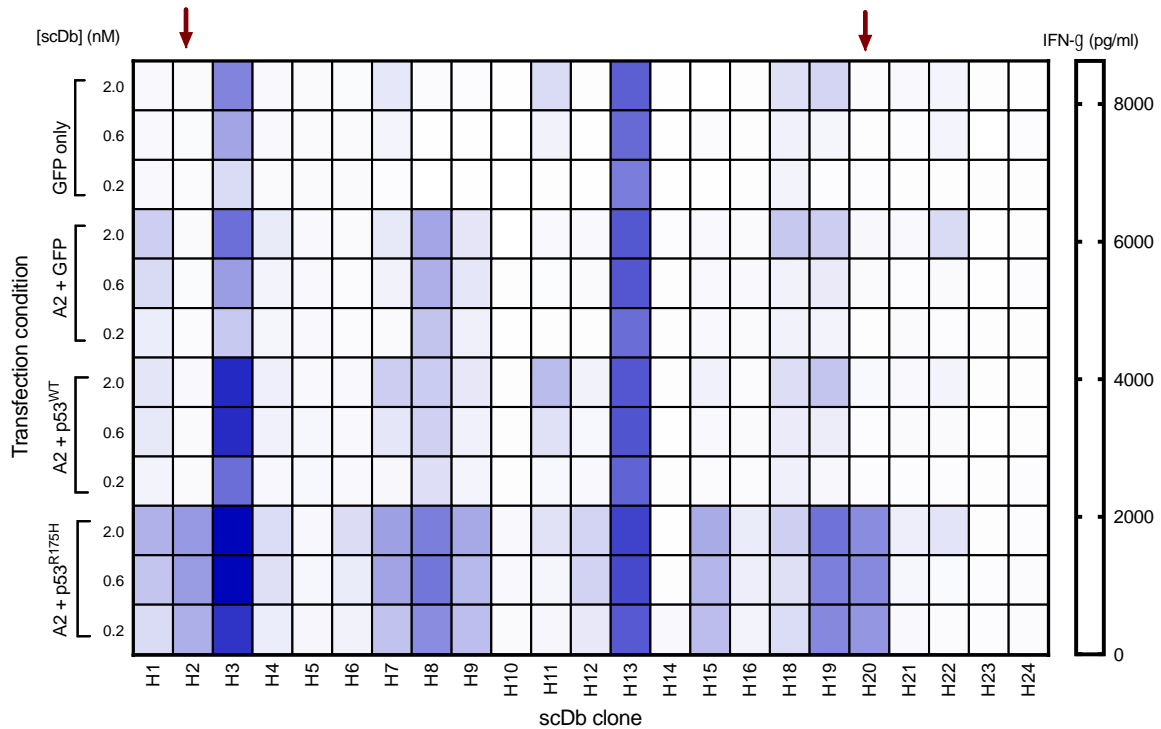

**Fig. S2. Selection of p53<sup>R175H</sup>/HLA-A\*02:01 reactive antibodies and their conversion into T cell-retargeting scDb.** (A) Flow cytometric screening of phage clones enriched by panning.

After 5 rounds of panning, phage clones from the enriched phage pool were isolated by limiting dilution and grown in deep 96-well plates. Supernatants containing individual phage clones were used to assess binding to T2 cells loaded with  $\beta$ 2 microglobulin ( $\beta$ 2M) only,  $\beta$ 2M plus p53<sup>WT</sup> peptide (HMTEVVRRC), or  $\beta$ 2M plus p53<sup>R175H</sup> peptide (HMTEVVRHC) via flow cytometry.

The median fluorescence intensity (MFI) ratio was defined as MFI (p53<sup>R175</sup> peptide)/MFI (p53<sup>WT</sup> peptide). NC, no phage control. (B) Schematic representation of the structure of the T cell-

engaging bispecific single-chain diabody (scDb) used in our experiments. V<sub>L</sub>, variable light domain; V<sub>H</sub>, variable heavy domain; pHLA, peptide-HLA complex; SL, short linker; LL, long linker. (C) Screening of scDb clones via IFN- $\gamma$  stimulation by p53-expressing cells. scDbs

generated by linking each anti-p53<sup>R175H</sup>/HLA-A\*02:01 pHLA scFv clone with an anti-CD3 scFv (UCHT1) were co-incubated with T cells and COS-7 cells transfected with GFP alone, HLA-A\*02:01 + GFP, HLA-A\*02:01 + p53<sup>WT</sup>, or HLA-A\*02:01 + p53<sup>R175H</sup> plasmids at an

effector:target (E:T) ratio of 1:1. After a 20-hour coincubation, the supernatant was harvested for IFN- $\gamma$  detection by ELISA. Arrows indicate clones H2 and H20. A2, HLA-A\*02:01. (D)

Characterization of H20-scDb. H20-scDb was incubated with biotinylated p53<sup>WT</sup>/HLA-A\*02:01 (gray) pHLA and p53<sup>R175H</sup>/HLA-A\*02:01 (red) monomers coated on streptavidin microplates at the specified concentrations, then binding detected with protein L and anti-protein L HRP. Data

indicate mean  $\pm$  SD of three technical replicates.

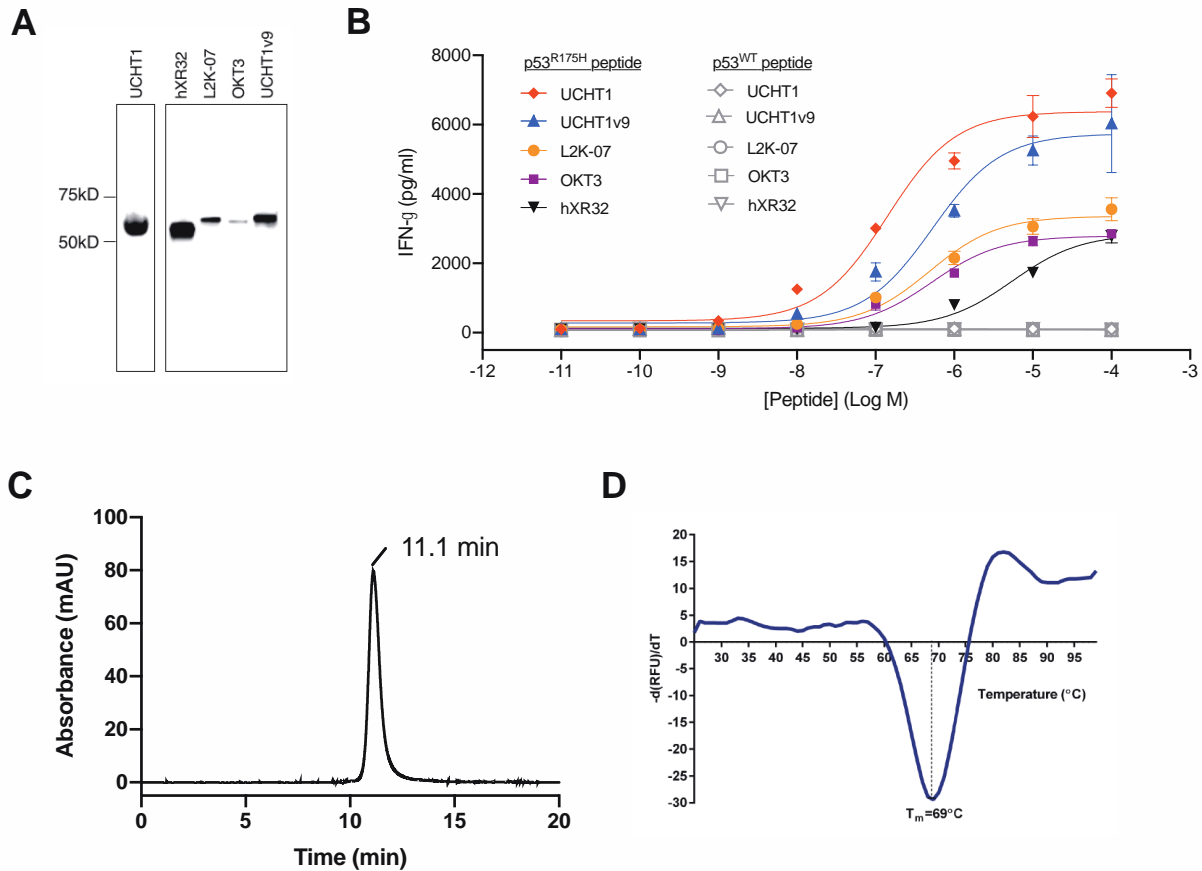

**Fig. S3. Characteristics of scDBs generated by linking H2-scFv with anti-CD3 $\epsilon$  scFvs.** (A)

Expression of scDBs composed of linking H2-scFv with different anti-CD3 $\epsilon$  scFvs was assessed by anti-6x-His tag Western blotting. (B) The scDBs were co-incubated with T cells and T2 cells pulsed with titrated concentrations of p53<sup>WT</sup> or p53<sup>R175H</sup> peptide at an E:T ratio of 2:1. IFN- $\gamma$  release was measured by ELISA. Data indicate mean  $\pm$  SD of three technical replicates. (C)

Analytical chromatogram of the purified H2-UCHT1-scDb (H2-scDb) showing absorbance at 280 nm. The retention time of the H2-scDb was marked above the peak. (D) DSF analysis of the

negative derivative or relative fluorescence unit (RFU) vs. temperature of the H2-scDb. The

melting temperature T<sub>m</sub> at 69 °C corresponds to the peak/maximum of the first derivative of the curve and the notion of one transition state.

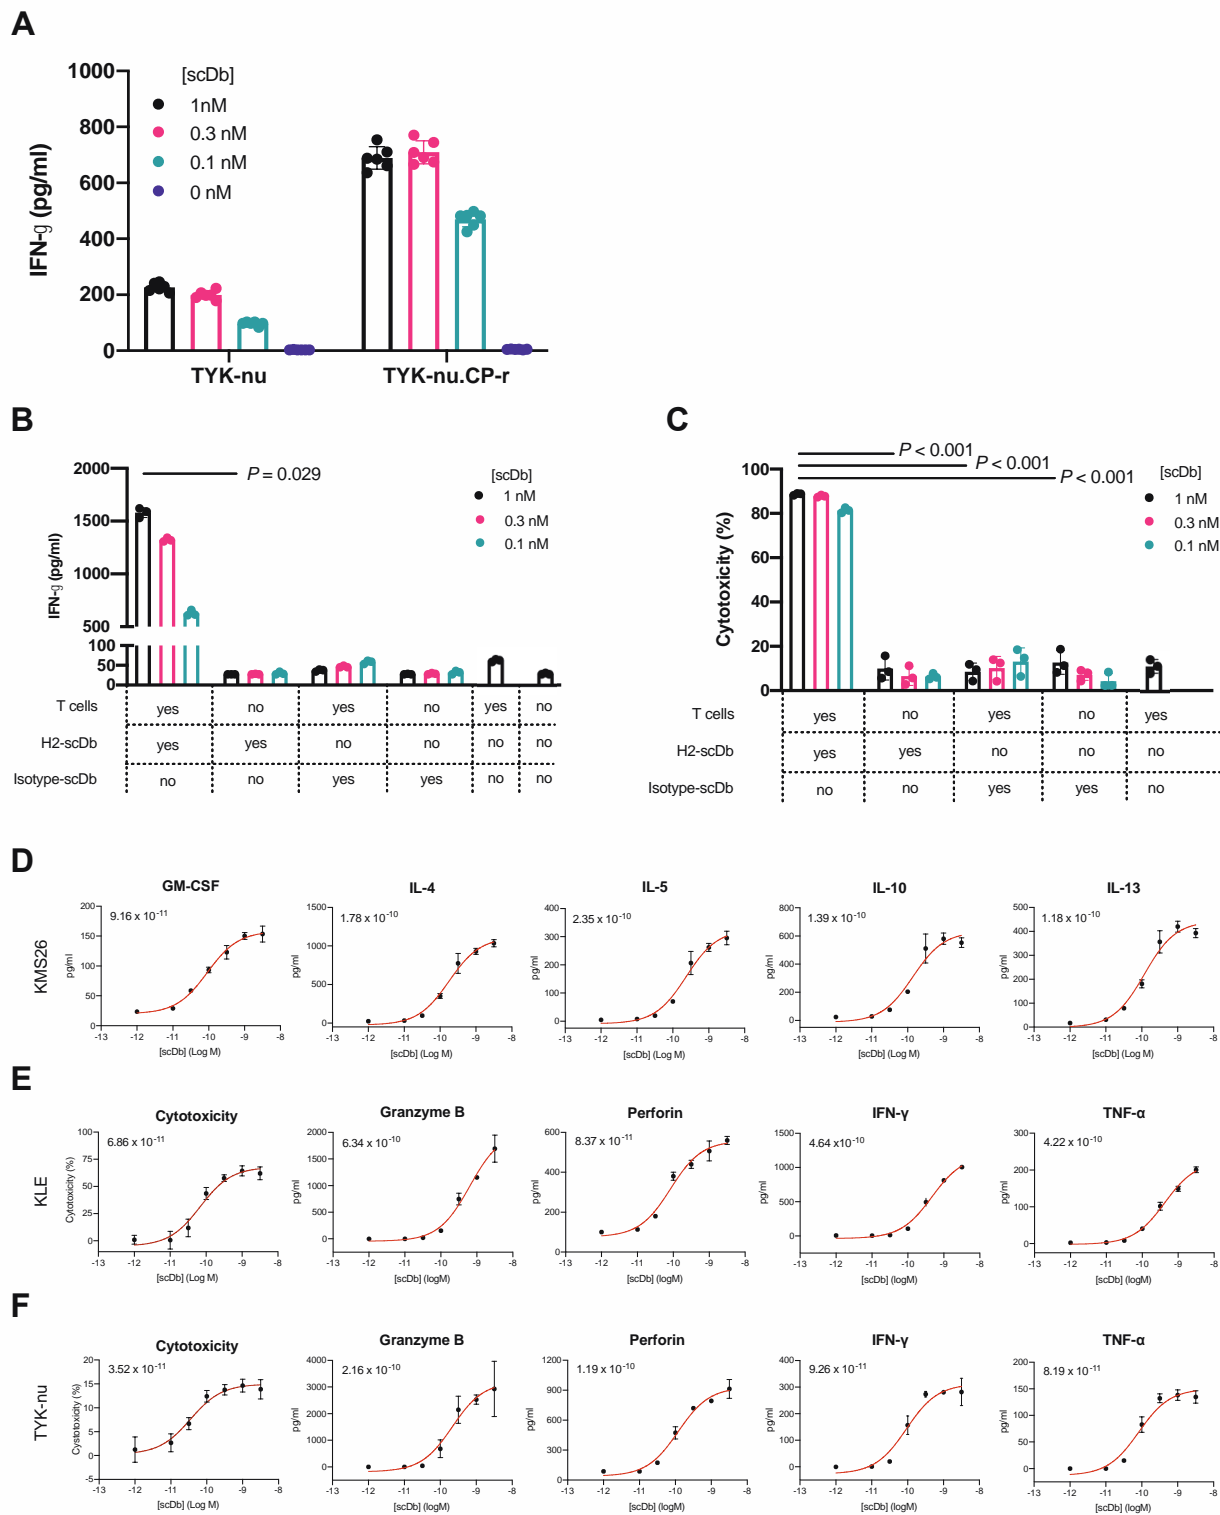

**Fig. S4. Reactivity of H2-scDb against p53<sup>R175H</sup>/HLA-A\*02:01-expressing tumor cells. (A)**

TYK-nu and its cisplatin-resistant subline TYK-nu.CP-r (77) were cultured with H2-scDb and T

cells at an E:T ratio of 2:1. IFN- $\gamma$  release was measured by ELISA. Data indicate mean  $\pm$  SD of six technical replicates and are representative of two independent experiments. (B, C) KMS26 cells were cultured with H2-scDb or an isotype scDb (scFv against an irrelevant pHLA linked with UCHT1 scFv) in the absence or presence of T cells at an E:T ratio of 2:1. IFN- $\gamma$  release was measured by ELISA (B), and cytotoxicity was assessed by luminescent assay (C). Data indicate mean  $\pm$  SD of three technical replicates, analyzed by Kruskal-Wallis test with Dunn's multiple comparisons (B) or one-way analysis of variance (ANOVA) with Tukey's multiple comparisons (C). (D-F) T-cell cytotoxicity and cytokine release mediated by H2-scDb in response to (D) KMS26 (cytotoxicity and other effector proteins shown in main text), (E) KLE, and (F) TYK-nu cell line at an E:T ratio of 2:1 was assessed by antibody-based assays. EC<sub>50</sub> (M) for each analyte is shown in the corresponding graphs. Data indicate mean  $\pm$  SD of three technical replicates.

5

10

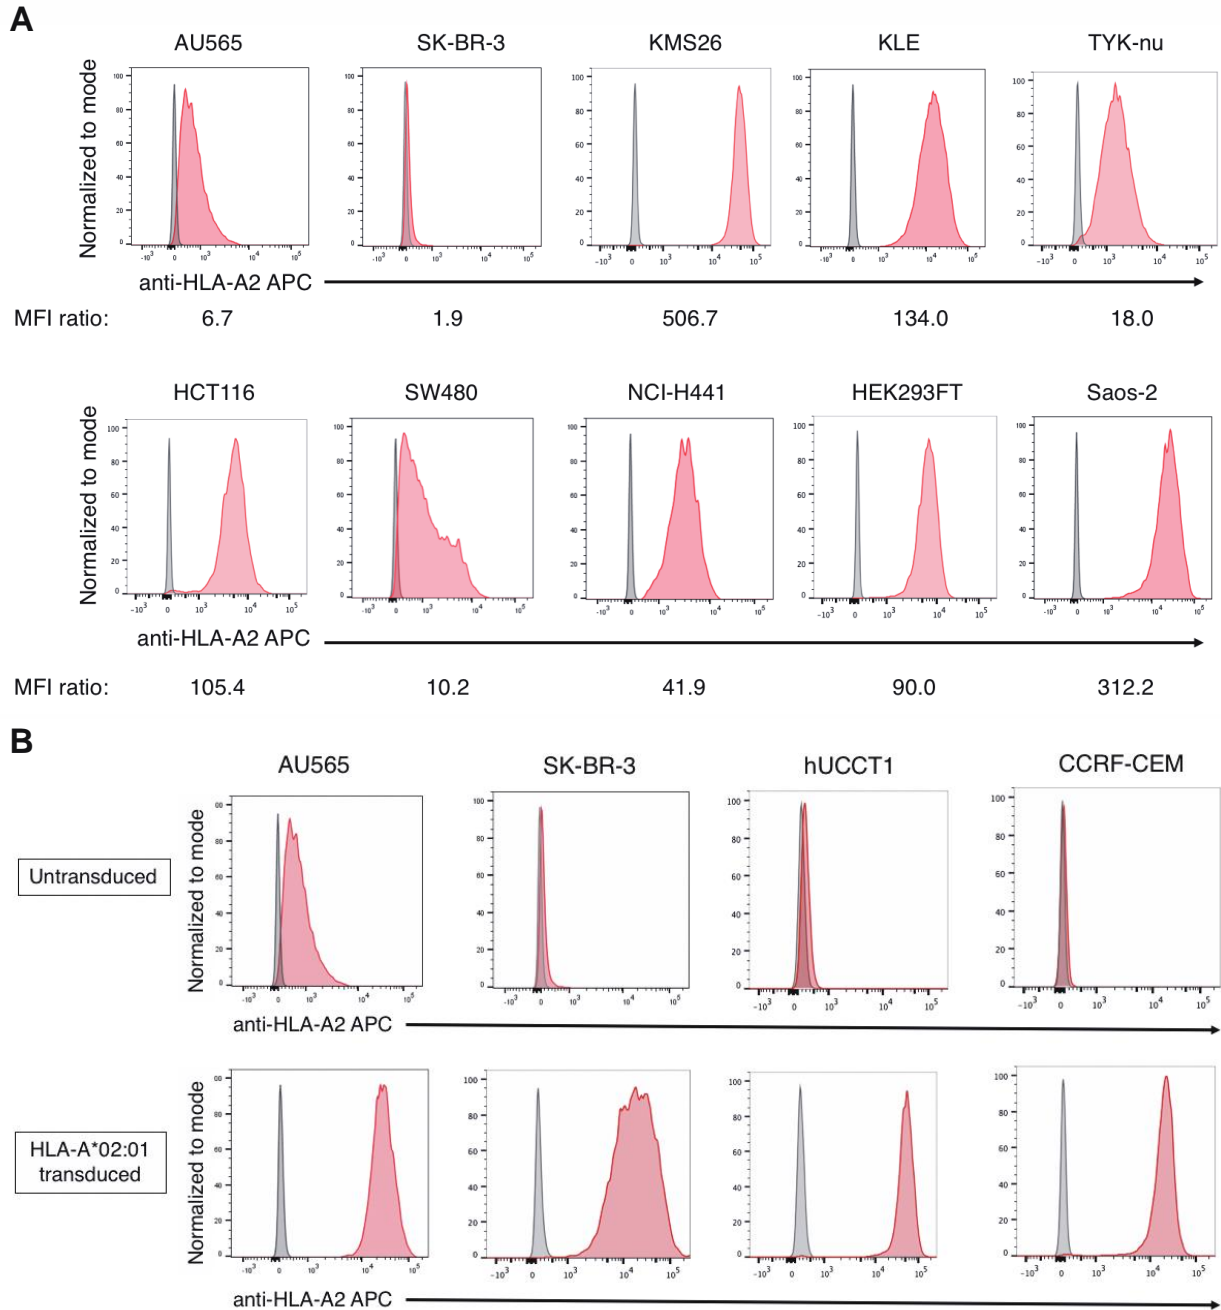

**Fig. S5. Flow cytometric evaluation of HLA-A\*02 expression.** (A) Expression of HLA-A\*02 on tumor cell lines was evaluated by flow cytometry. The red histogram represents staining with anti-HLA-A\*02 (clone BB7.2, which also recognizes HLA-A\*28), and the gray histogram represents staining with an isotype control. The median fluorescence intensity (MFI) ratio is defined as MFI (anti-HLA-A\*02)/MFI (isotype control). (B) HLA-A\*02:01-expressing



retrovirus was transduced into cell lines that weakly or do not detectably express HLA-A\*02:01. Expression of HLA-A\*02:01 in the parental as well as transduced and flow-sorted cell lines was evaluated by flow cytometry. The red histogram represents staining with anti-HLA-A\*02 (clone BB7.2) and the gray histogram represents staining with an isotype control.

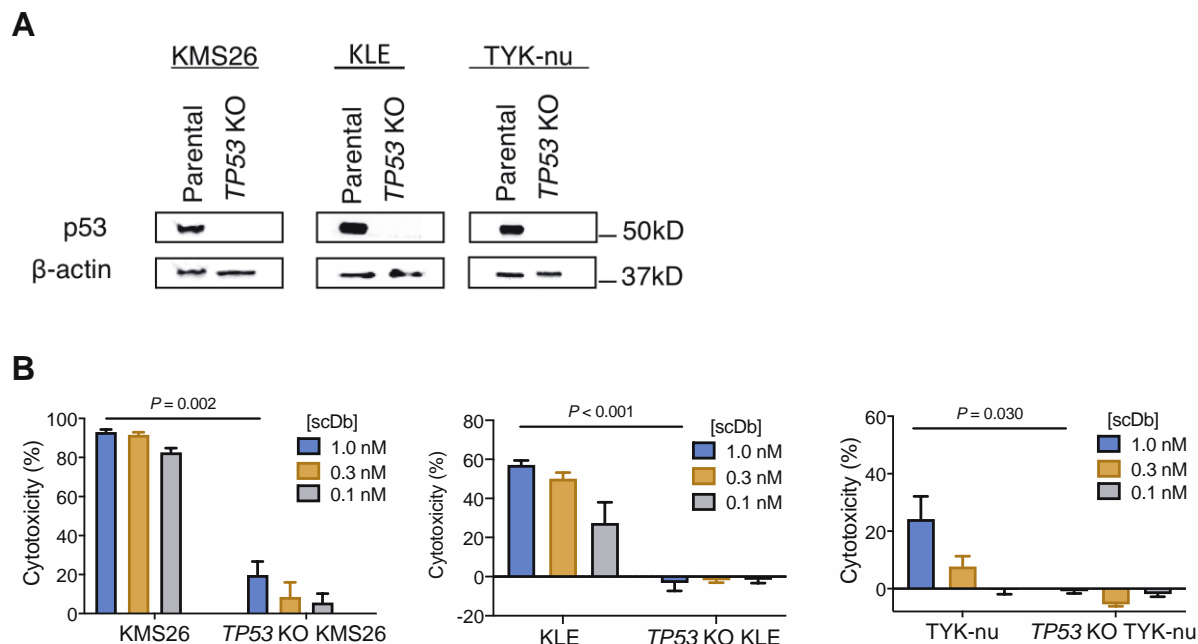

**Fig. S6. Determination of H2-scDb specificity using CRISPR-edited isogenic cell lines.** (A)

Expression of p53 protein in the parental and *TP53* KO clones of KMS26, KLE, and TYK-nu

5

was assessed by Western blot with anti-p53 antibody (clone DO-1). (B) Cytotoxicity mediated by H2-scDb in response to parental tumor cell lines and their *TP53* KO counterparts at an E:T ratio of 2:1 (KMS26, TYK-nu) or 5:1 (KLE) was measured luminescent cytotoxicity assays.

Data indicate mean  $\pm$  SD of three technical replicates and are representative of two independent experiments, analyzed by two-tailed *t*-test.

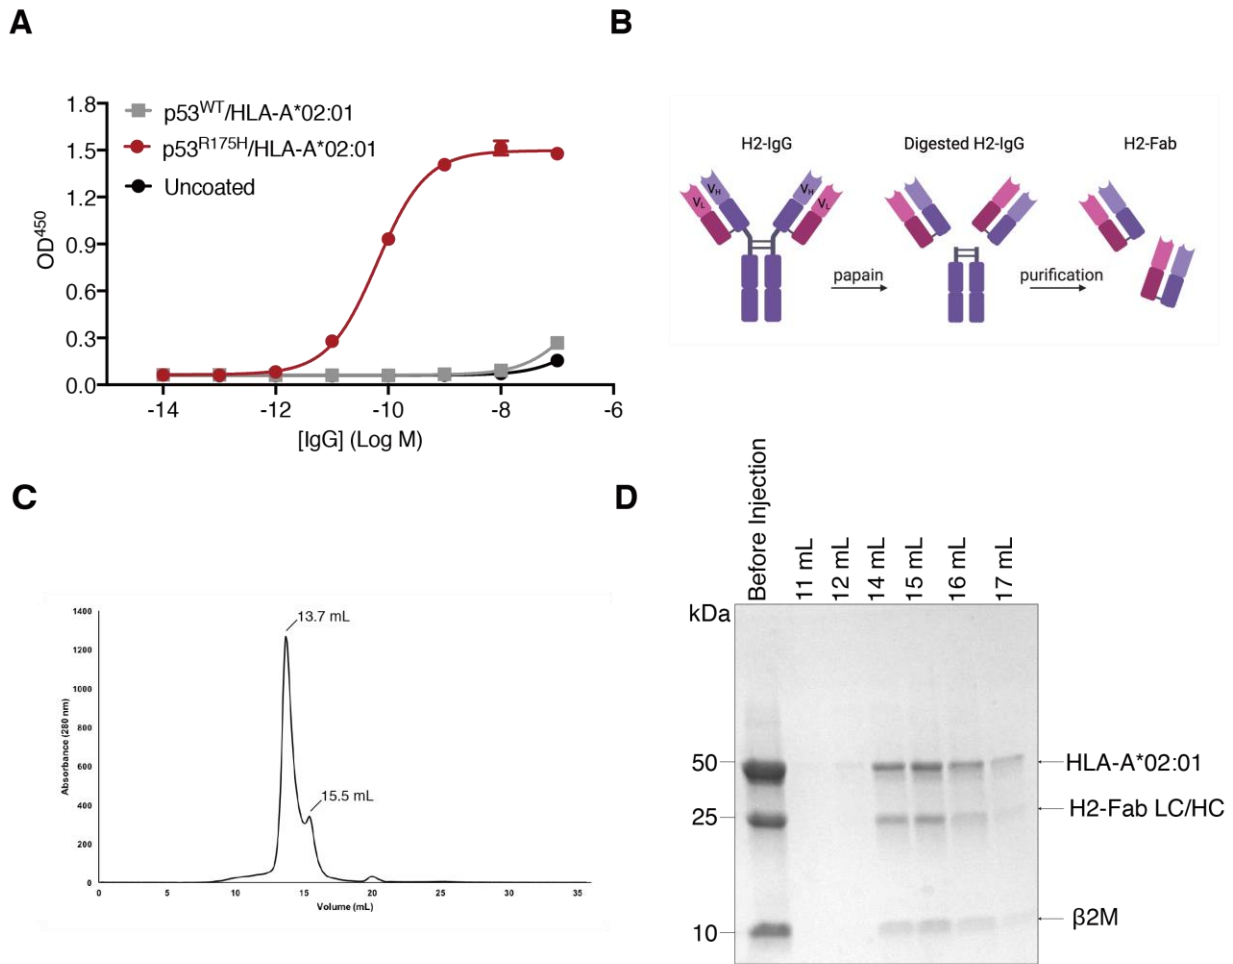

**Fig. S7. The H2-Fab–p53<sup>R175H</sup>/HLA-A\*02:01 complex.** (A) H2-scFv was converted into full-length IgG (H2-IgG) and incubated with biotinylated p53<sup>R175H</sup>/HLA-A\*02:01 (red) and p53<sup>WT</sup>/HLA-A\*02:01 (gray) pHLA monomers coated on streptavidin microplates at the specified concentrations followed by detection with anti-human IgG HRP. Data indicate mean  $\pm$  SD of three technical replicates. (B) Illustration depicting the generation of H2-Fab from H2-IgG. (C) Size-exclusion chromatogram of the pHLA-A\*02:01 in complex with the H2-Fab. Protein was monitored by A280 nm with a major peak (~100 kDa). (D) Coomassie-stained gradient SDS-polyacrylamide gel electrophoresis gel of the eluted fractions at 11-17 mL from (C).

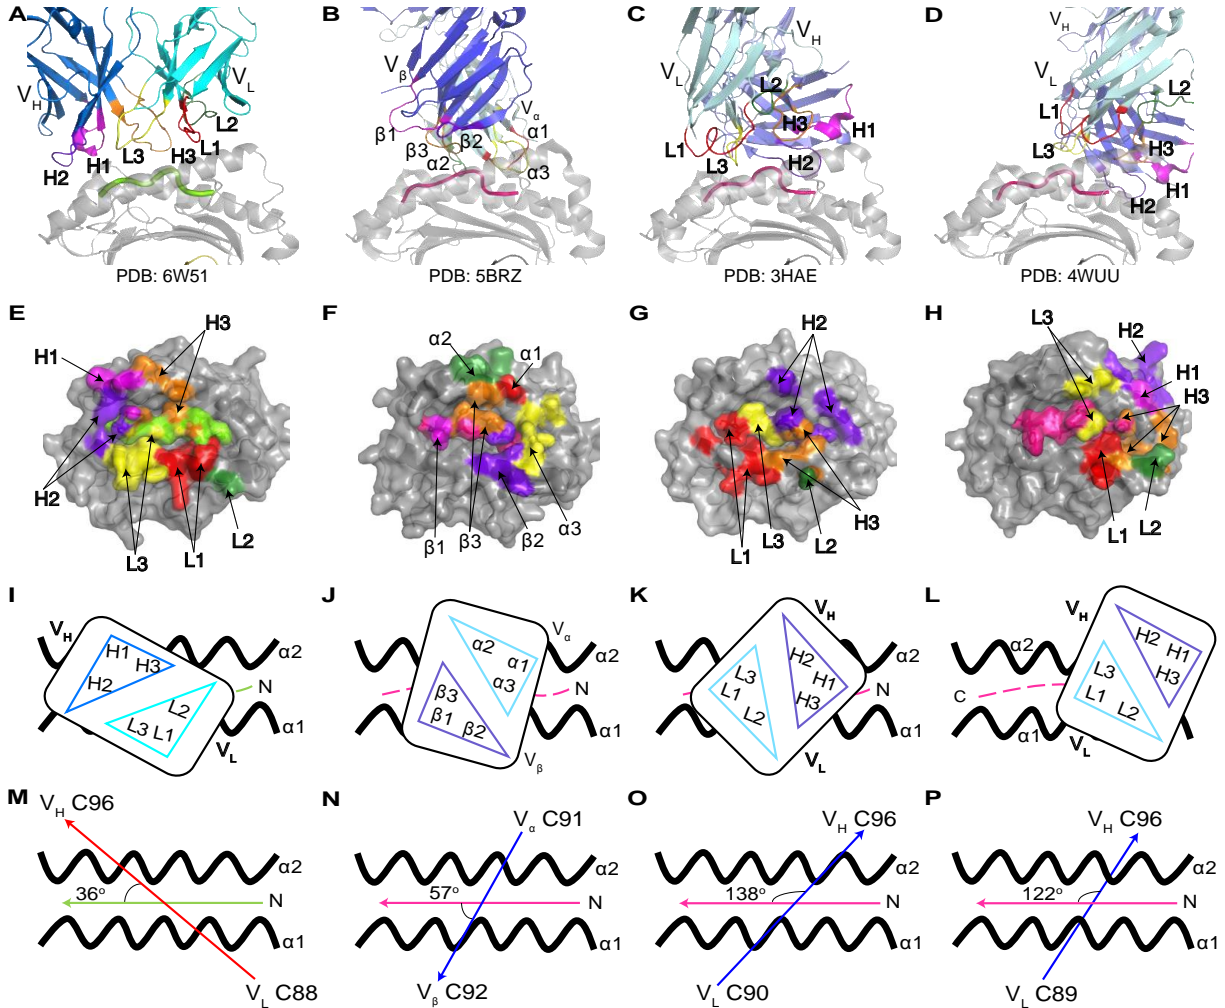

**Fig. S8. Comparison of the binding orientations among TCRm-pHLA and TCR-pHLA**

**complexes.** (A) Close depiction of binding of the H2-Fab to p53<sup>R175H</sup>/HLA-A\*02:01 with CDRs

5

colored as in Fig. 4. (B) Binding of a TCR to melanoma-associated antigen 3 (MAGE-A3) and HLA-A\*01:01 (PDB ID 5BRZ). Same orientation as (A). The MAGE-A3 TCR displays the canonical, diagonal binding motif as that of most known TCR topologies (47).

(C) Recognition of the 3M4E4 Fab for the NY-ESO-1<sub>157-165</sub>/HLA-A\*02:01 complex (PDB ID 3HAE) (46). Same orientation as (A). (D) Binding of the ESK1 Fab to Wilms tumor 1 peptide and HLA-A\*02:01

10

(PDB ID 4WUU) (40). Same orientation as (A). (E, F, G, and H) Bird's-eye view of surface representation of the HLA-A\*02:01/\*01:01 colored in gray with the contacting residues of H2-

Fab, MAGE-A3 TCR, 3M4E4 Fab, and ESK1 Fab, respectively, colored according to CDRs. (I, J, K, and L) Schematic representation of E, F, G, and H, respectively. H2-Fab-p53<sup>R175H</sup>/HLA-A\*02:01 shows a different mode of antibody recognition compared with other Fab/TCR-pHLA complexes. (M, N, O, and P) Schematic representation of Fab/TCR docking angle for I, J, K, and L, respectively. The docking angle was calculated from the web server TCR3d, which was based on the C<sup>alpha</sup> of Cys88 (or equivalent) of the disulfide bond of the V<sub>L</sub>/α domain and the C<sup>alpha</sup> of Cys96 (or equivalent) of the disulfide bond of the V<sub>H</sub>/β domain of each antibody and TCR. The arrowed lines indicate the direction of each vector. The docking angle was calculated using the web server TCR3d.

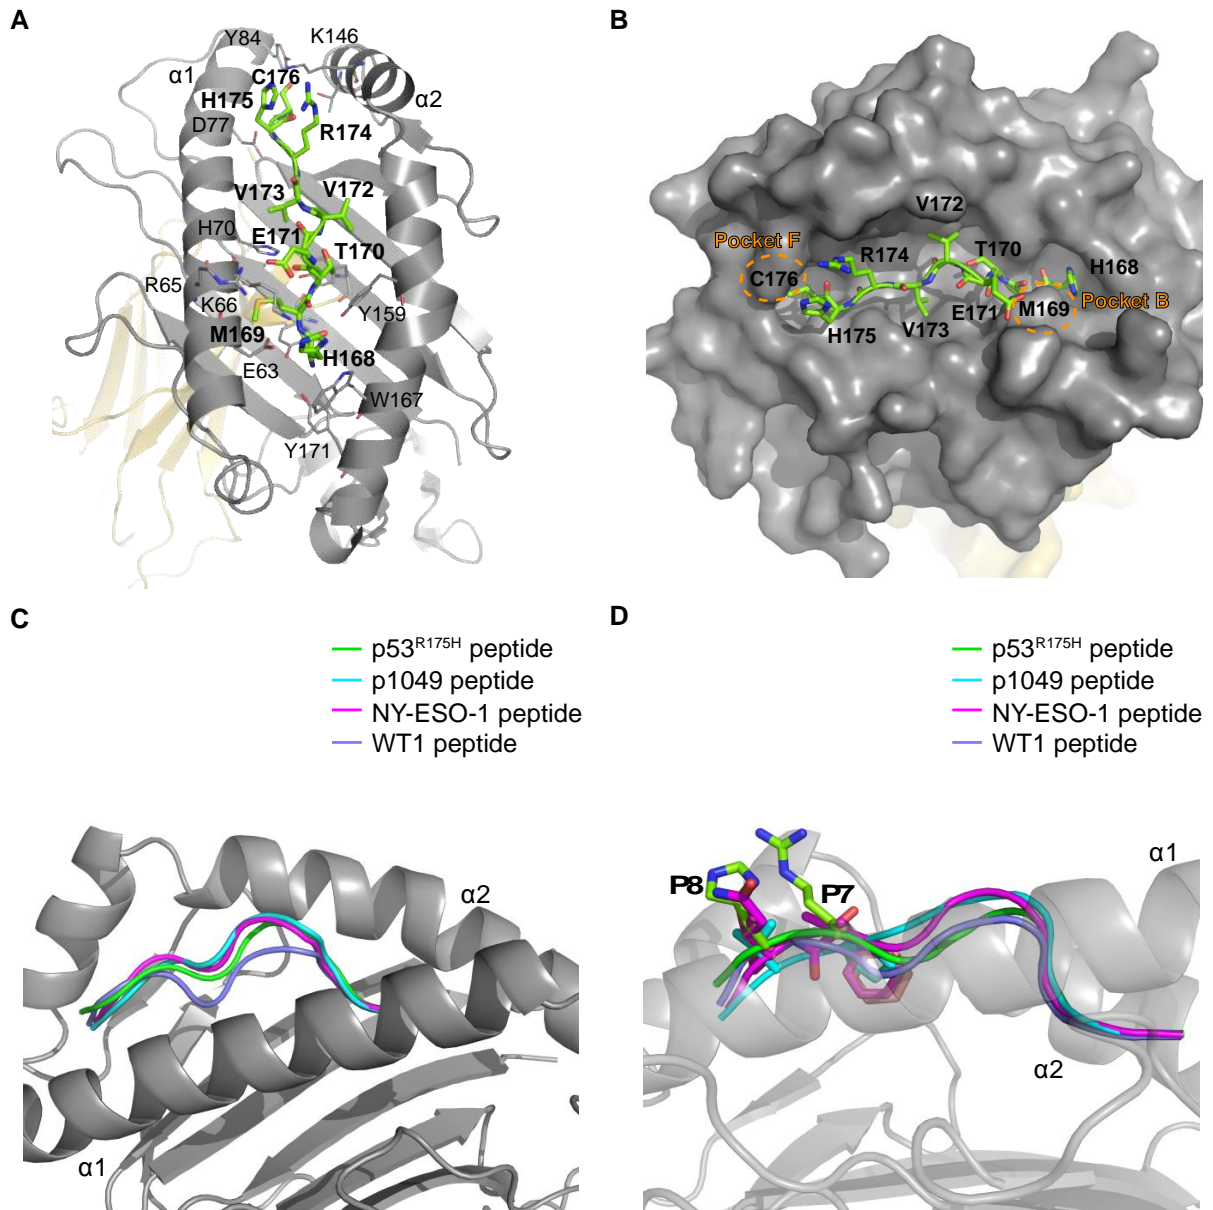

**Fig. S9. The neoantigen p53<sup>R175H</sup> binds to HLA-A\*02:01 in a canonical fashion.** (A) Bird's-

eye view of the p53<sup>R175H</sup> peptide interactions with HLA-A\*02:01. The peptide (green) and the  
 5 side chains (gray) of interacting residues of HLA-A\*02:01 are represented as sticks. Hydrogen  
 bonds are shown as dashed lines. The N-terminal His168 is anchored by three tyrosine residues  
 of HLA-A\*02:01, one at the base of the cleft (Tyr7, not shown) and two on  $\alpha 2$  (Tyr159, 171),  
 while its side chain is within hydrogen bonding distance of Lys66 ( $\alpha 1$ ) and Thr163 ( $\alpha 2$ , not

shown). Glu63 of HLA-A\*02:01  $\alpha$ 1 forms a hydrogen bond with the backbone amino of Met169, an anchor residue of p53<sup>R175H</sup> that is situated within the hydrophobic B pocket of the HLA. The main chain of Thr170 is stabilized by a hydrogen bond to Tyr99 (not shown), located at the base of the cleft while the side chain of Glu171 forms a salt-bridge with the side chain of Arg65. Positions 5-8 (Val172, Val173, Arg174, His175) of the p53<sup>R175H</sup> peptide are stabilized by multiple hydrophobic and aliphatic residues with no direct hydrogen bonding contacts to the HLA-A\*02:01. Towards the C-terminus of the peptide, the carboxyl group of Cys176, another anchor residue that lies within the F pocket, is secured by Tyr84 ( $\alpha$ 1) and Lys146 ( $\alpha$ 2), while the side chain sulfhydryl is near Thr143 on  $\alpha$ 2. (B) Surface representation of the HLA-A\*02:01 (gray) with the p53<sup>R175H</sup> peptide shown in green as sticks. Anchor pockets B and F are circled in orange. (C) Structural alignment of the following HLA-A\*02:01-bound peptides in the binding pocket: green (this work, PDB ID 6W51), cyan (p1049, PDB ID 2JCC (78)), magenta (NY-ESO-1, PDB ID 3HAE (46)), and light purple (WT1, PDB ID 4WUU (40)). (D) Zoomed in view of (B) with helix  $\alpha$ 1 transparent and residues at positions 7 (P7) and 8 (P8) shown as sticks.

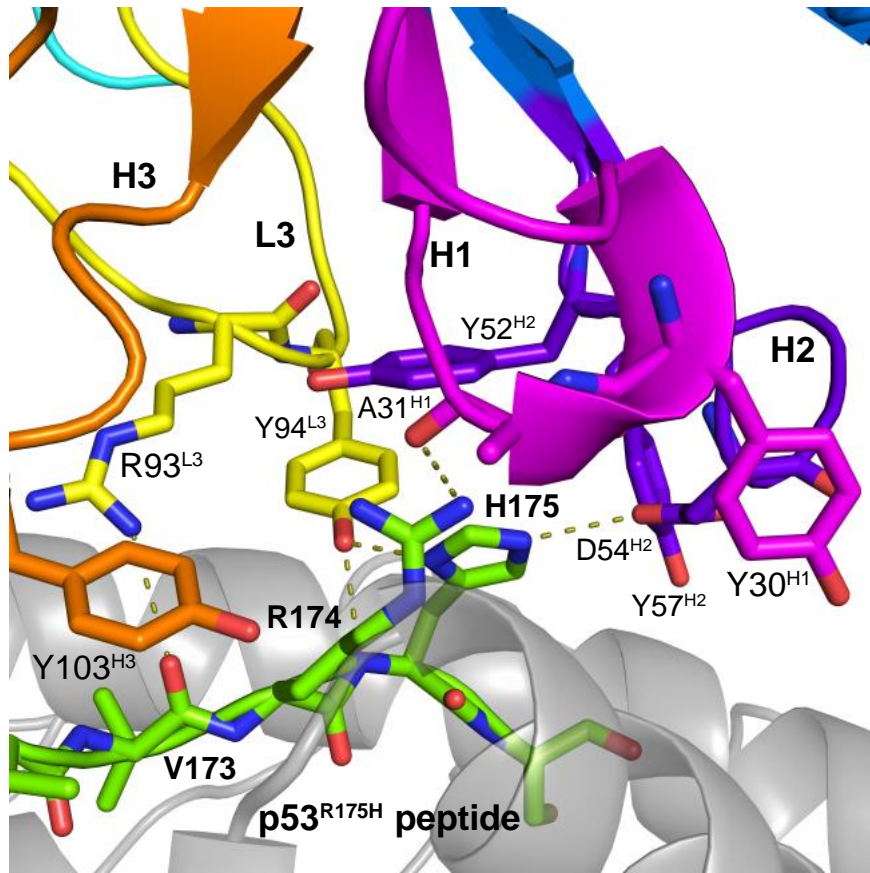

**Fig. S10. Hydrogen bonding pattern of the H2-Fab cage-like configuration.** The imidazole ring of His175 was at the center from the cage-like structure. The guanidinium group of Arg174 was at hydrogen bonding distance to the backbone carbonyl of Ala31 (CDR-H1). Another p53<sup>R175H</sup> peptide-antibody direct contact involves the backbone carbonyl of Val173 hydrogen bonding with the side chain of Arg93 (CDR-L3).



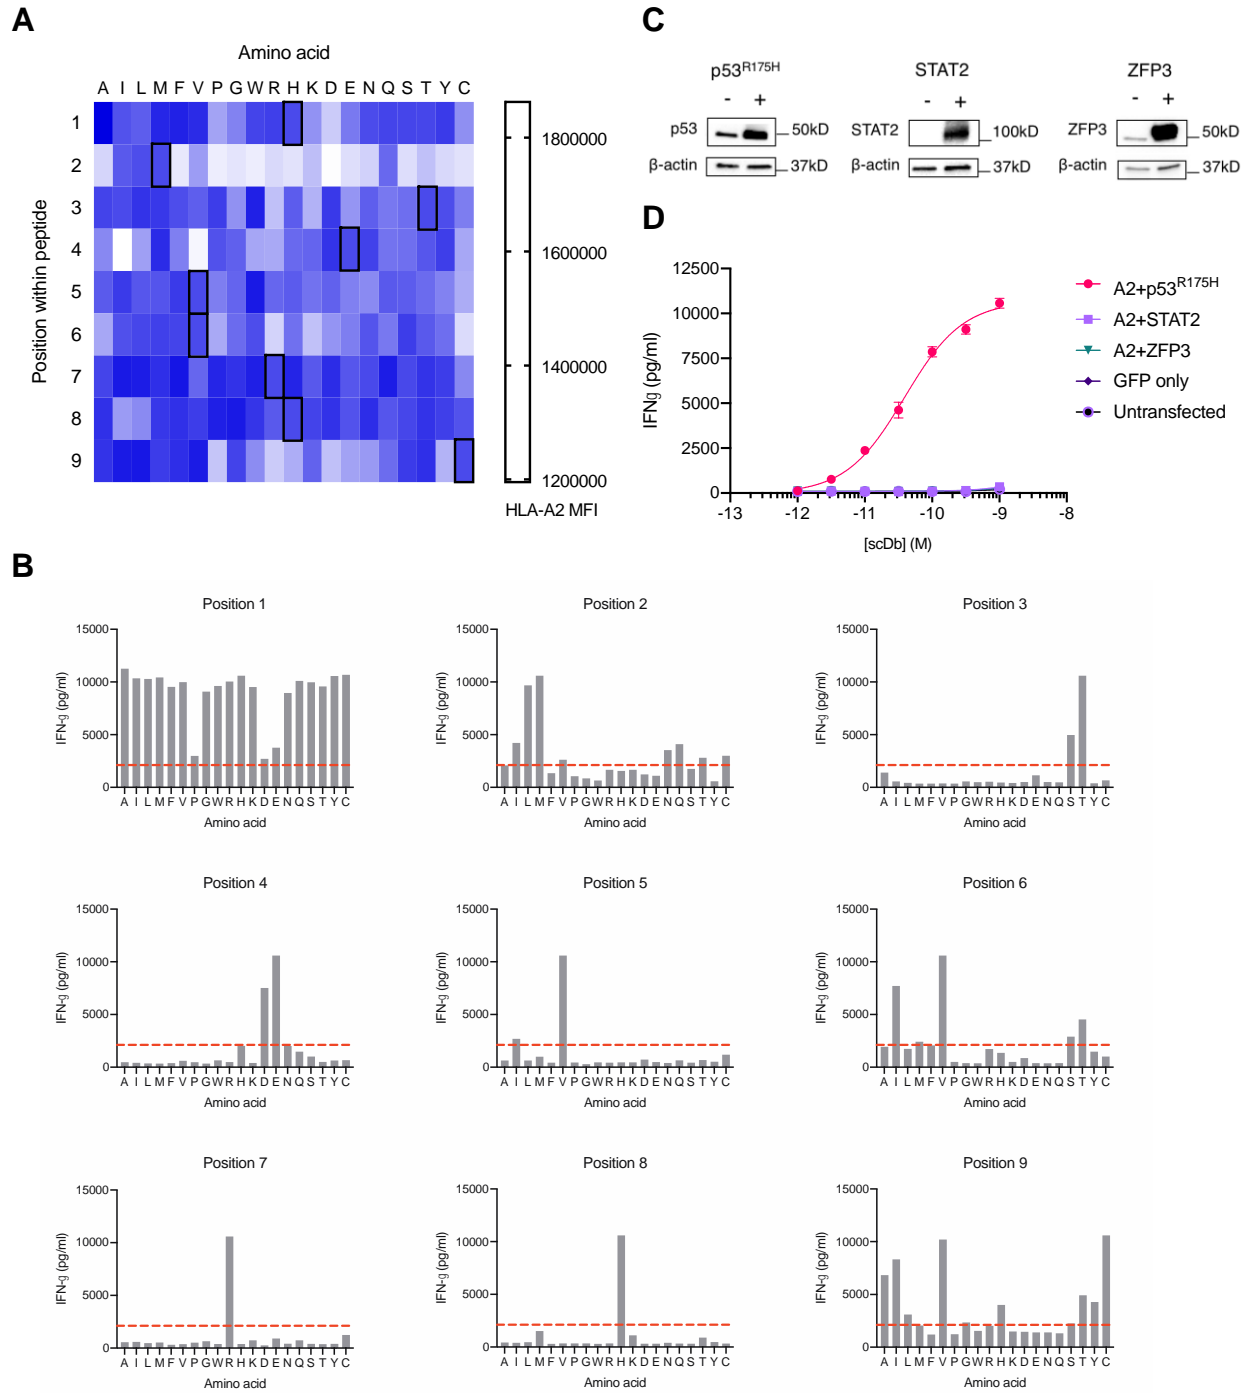

**Fig. S11. Assessment of H2-scDb cross-reactivity.** (A) A peptide library was generated by systemically substituting the amino acid at each position of the target peptide (HMTEVVRHC) with each of the remaining 19 common amino acids. T2 cells were loaded with each of the variant peptides at 100  $\mu$ M in the presence of 10  $\mu$ g/ml  $\beta$ 2M and anti-HLA-A\*02 antibody

(clone BB7.2). HLA-A\*02:01 was stabilized by peptide binding and evaluated by flow cytometry (79). Black boxes represent the amino acids in the parental peptide. MFI, median fluorescence intensity. (B) T2 cells loaded with variant peptides in the positional scanning library were incubated with 1 nM H2-scDb and T cells at an E:T ratio of 2:1. IFN- $\gamma$  release was measured by ELISA. Dotted lines represent 20% of parental peptide IFN- $\gamma$  value. The binding motif established by the 20% reactivity cutoff, expressed in PROSITE pattern, was x-[ILMVNQTC]-[ST]-[DE]-[IV]-[IMVST]-R-H-[AILVGHSTYC]. Data indicate mean of two technical replicates. (C-D) H2-scDb was co-incubated with T cells and COS-7 cells transfected with plasmids expressing HLA-A\*02:01 and full-length p53<sup>R175H</sup>, STAT2, or ZFP3 at an E:T ratio of 5:1. (C) Expression of target proteins by COS-7 cells was assessed by Western blot staining. (D) IFN- $\gamma$  secretion was measured by ELISA. The signals for all of the transfectants except for p53<sup>R175H</sup> were indistinguishable and are clustered near the x-axis. Data indicate mean  $\pm$  SD of three technical replicates and are representative of two independent experiments.

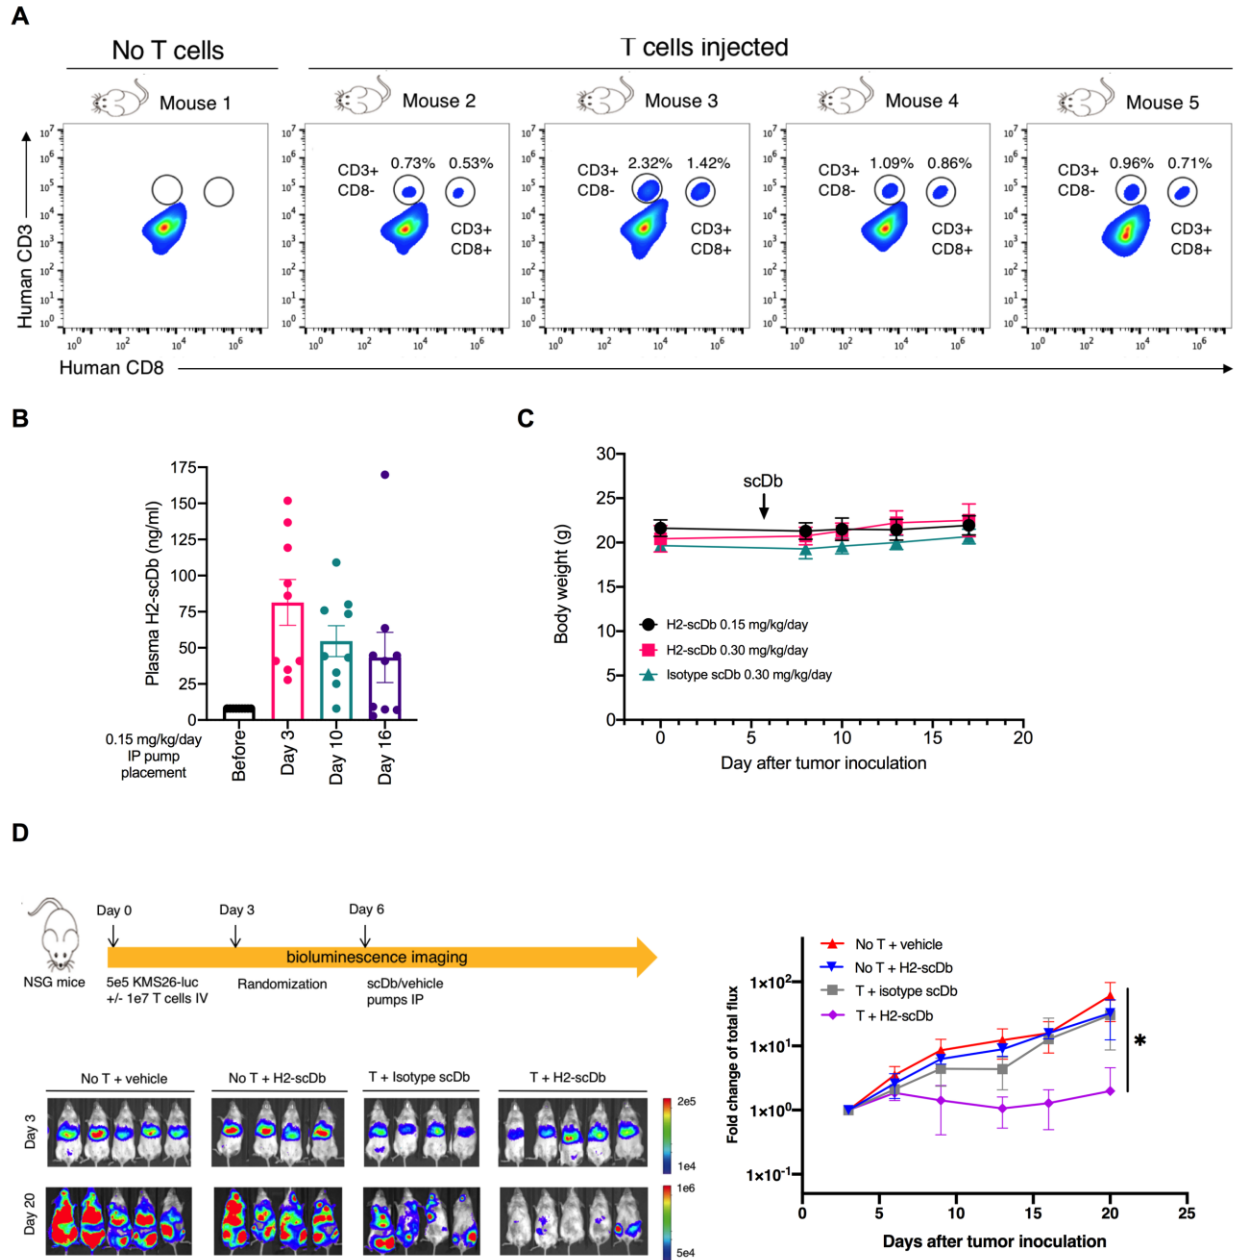

**Fig. S12. Assessing T-cell engraftment and effects of H2-scDb therapy in NSG mice. (A)**

Three days after the injection of KMS26 cells and human T cells, peripheral blood of mice was obtained to assess human T cell engraftment by flow cytometry. Plots shown were gated on live single cells. (B) Plasma of mice was collected 3 days before and 3, 10 and 16 days after the IP

5 implantation of infusion pumps. Plasma concentration of H2-scDb was measured by ELISA.  $n = 9$  mice. Data shown represent mean  $\pm$  SEM. (C) Serial monitoring of body weight of the mice in

the established KMS26 model presented in Fig. 6B.  $n = 5$  mice per group. Data shown represent mean  $\pm$  SD. (D) To assess the need for human T-cells in this model, NSG mice were engrafted with  $5 \times 10^5$  KMS26 cells on day 0 with or without  $1 \times 10^7$  human T cells (T) through IV injection, followed by randomization on day 3 and IP placement of infusion pumps on day 6 to deliver H2-scDb or vehicle at the infusion rate of 0.15 mg/kg/day. Tumor growth was monitored by bioluminescence imaging.  $n = 4$  or 5 mice per group. Data shown represent mean  $\pm$  SD. \*No T + vehicle vs. T + H2-scDb,  $P = 0.008$  and 0.049, No T + H2-scDb vs. T + H2-scDb  $P = 0.011$  and 0.054, T + Isotype scDb vs. T + H2-scDb  $P = 0.021$  and 0.078, No T + vehicle vs. No T + H2-scDb  $P = 0.224$  and 0.238 by two-tailed  $t$ -test at the last time point with and without assuming equal variance, respectively.

10

| Cell line | HLA and p53 status                          | No. cells (millions) used for analysis | Abundance (femtomole) | Copy no. / cell* |
|-----------|---------------------------------------------|----------------------------------------|-----------------------|------------------|
| COS-7     | Exogenous HLA-A*02:01/p53 <sup>R175H</sup>  | 375.0                                  | 32.43                 | 703.5            |
| COS-7     | Exogenous HLA-A*02:01/p53 <sup>WT</sup>     | 375.0                                  | Not detectable        | Not detectable   |
| KMS26     | Endogenous HLA-A*02:01/p53 <sup>R175H</sup> | 157.0                                  | 0.48                  | 2.4              |
| KLE       | Endogenous HLA-A*02:01/p53 <sup>R175H</sup> | 92.4                                   | 0.18                  | 1.5              |
| TYK-nu    | Endogenous HLA-A*02:01/p53 <sup>R175H</sup> | 168.3                                  | 0.28                  | 1.3              |

**Table S1. Quantitative assessment of the p53<sup>R175H</sup> peptide.** The amounts of p53<sup>R175H</sup> peptide (HMTEVVRHC) present in COS-7 cells transfected with HLA-A\*02:01 and p53<sup>WT</sup> or p53<sup>R175H</sup>, as well as cell lines that endogenously express HLA-A\*02:01 and p53<sup>R175H</sup>, were quantified using mass spectrometry (27). \*Corrected for peptide recovery (all cell lines) and transfection efficiency (COS-7).

| scFv | VL                                                                                                                         | VH                                                                                                                                      |
|------|----------------------------------------------------------------------------------------------------------------------------|-----------------------------------------------------------------------------------------------------------------------------------------|
| H2   | DIQMTQSPSSLSASVGDRVTITCRASQ<br>DVNTAVAWYQQKPGKAPKLLIYSAY<br>FLYSGVPSRFSGSRSGTDFLTISLQP<br>EDFATYYCQQYSRYSPTVFGQGTKVE<br>IK | EVQLVESGGGLVQPGGSLRLSCAASG<br>FNVYASGMHWVRQAPGKGLEWVAK<br>IYPSDYTTYADSVKGRFTISADTSKN<br>TAYLQMNSLRAEDTAVYYCSRDSFY<br>YVYAMDYWGQGLTVTVSS |
| H20  | DIQMTQSPSSLSASVGDRVTITCRASQ<br>DVNTAVAWYQQKPGKAPKLLIYSASF<br>LYSGVPSRFSGSRSGTDFLTISLQPE<br>DFATYYCQQSNAYPITVFGQGTKVEIK     | EVQLVESGGGLVQPGGSLRLSCAASG<br>FNLNSYYMHWVRQAPGKGLEWVAM<br>IIPGYGYTNYADSVKGRFTISADTSKN<br>TAYLQMNSLRAEDTAVYYCSRSYYM<br>YMDYWGQGLTVTVSS   |

**Table S2. Sequences of the top scFv clones from phage library selection**

| <b>anti-CD3<math>\epsilon</math> scFv clone</b> | <b>Reported affinity (K<sub>D</sub>, nM)</b> | <b>Format in which affinity was measured</b> | <b>References</b> |
|-------------------------------------------------|----------------------------------------------|----------------------------------------------|-------------------|
| UCHT1                                           | 1.8                                          | Full-length antibody                         | (80)              |
| UCHT1v9                                         | 4.7                                          | Full-length bispecific antibody              | (81)              |
| L2K-07                                          | 110                                          | Bispecific T-cell engager (BiTE)             | (82)              |
| OKT3                                            | 2730                                         | Fab                                          | (83)              |
| hXR32                                           | 21.2                                         | Dual affinity retargeting (DART) protein     | (84)              |

**Table S3. Reported affinities of the anti-human CD3 $\epsilon$  scFvs used in this study.**

| <b>p53<sup>R175H</sup>/HLA-A*02:01–Fab H2<br/>(PDB ID 6W51)</b> |                        |
|-----------------------------------------------------------------|------------------------|
| <b>Data Collection</b>                                          |                        |
| Diffraction source                                              | NSLS-II X17-ID-2       |
| Wavelength (Å)                                                  | 0.979321               |
| Temperature (K)                                                 | 100                    |
| Detector                                                        | Dectris EIGER X 16M    |
| Space group                                                     | P12 <sub>1</sub>       |
| <i>a, b, c</i> (Å)                                              | 113.3, 123.7, 136.9    |
| $\alpha, \beta, \gamma$ (°)                                     | 90, 100.4, 90          |
| Resolution range (Å)                                            | 30.37–3.53 (3.66–3.53) |
| Total no. of reflections                                        | 104,474 (9,774)        |
| No. of unique reflections                                       | 43,734 (4,273)         |
| Completeness (%)                                                | 95.3 (89.2)            |
| Redundancy                                                      | 2.4 (2.3)              |
| $\langle I/\sigma(I) \rangle$                                   | 3.6 (1.4)              |
| R <sub>merge</sub>                                              | 0.25 (0.76)            |
| R <sub>meas</sub>                                               | 0.29 (0.89)            |
| R <sub>pim</sub>                                                | 0.18 (0.58)            |
| CC <sub>1/2</sub>                                               | 0.94 (0.54)            |
| <b>Refinement</b>                                               |                        |
| Resolution range (Å)                                            | 30.38–3.53 (3.62–3.53) |
| No. of reflections, working set                                 | 41,530                 |
| R <sub>work</sub> /R <sub>free</sub>                            | 0.20/0.28 (0.30/0.35)  |
| <i>No. of non-H atoms</i>                                       |                        |
| MHC (HLA-A*02:01 + $\beta$ 2m)                                  | 3,078                  |
| p53 <sup>R175H</sup> peptide                                    | 75                     |
| Fab H2 Heavy Chain                                              | 1,667                  |
| Fab H2 Light Chain                                              | 1,652                  |
| Total of non-H atoms                                            | 6,472                  |
| <i>R.m.s. deviations</i>                                        |                        |
| Bonds (Å)                                                       | 0.009                  |
| Angles (°)                                                      | 1.66                   |
| Wilson B-factor (Å <sup>2</sup> )                               | 62                     |
| <i>Average B factors (Å<sup>2</sup>)</i>                        |                        |
| MHC (HLA-A*02:01 + $\beta$ 2m)                                  | 74                     |
| p53 <sup>R175H</sup> peptide                                    | 56                     |
| Fab H2 Heavy Chain                                              | 59                     |
| Fab H2 Light Chain                                              | 63                     |
| Total average B factor                                          | 63                     |
| <i>Ramachandran (%)</i>                                         |                        |
| Favorable                                                       | 95.2                   |
| Allowed                                                         | 3.8                    |
| Outlier                                                         | 1.0                    |

\*Values in parentheses are for highest-resolution shell. All atoms refer to non-H atoms.

**Table S4. X-ray crystallography data collection and refinement statistics.**



|                    | <b>Chains M, N</b><br>(Å/#C <sup>alpha</sup> ) | <b>Chains S, T</b><br>(Å/#C <sup>alpha</sup> ) | <b>Chains Q, R</b><br>(Å/#C <sup>alpha</sup> ) |
|--------------------|------------------------------------------------|------------------------------------------------|------------------------------------------------|
| <b>Chains O, P</b> | 0.32/382                                       | 0.36/414                                       | 0.42/413                                       |
| <b>Chains Q, R</b> | 0.45/419                                       | 0.27/386                                       | 0                                              |
| <b>Chains S, T</b> | 0.34/408                                       | 0                                              | –                                              |

**Table S5. Pairwise rmsd of the four H2-Fab in the asymmetric unit.** The root-mean square deviation (rmsd) and number of C<sup>alpha</sup> carbons were calculated by PyMOL (v2.2.3, Schrödinger, LLC). For chain reference see PDB ID 6W51.

|                                    | H2-Fab                                     | MAGE-A3 TCR                                   | NY-ESO-1 Fab<br>(3M4E4)               | ESK-1 Fab                                                                                             |
|------------------------------------|--------------------------------------------|-----------------------------------------------|---------------------------------------|-------------------------------------------------------------------------------------------------------|
| Affinity (K <sub>D</sub> )         | 86 nM                                      | 7.1 nM                                        | 95 nM                                 | 13.2 nM                                                                                               |
| PDB                                | 6W51                                       | 5BRZ                                          | 3HAE                                  | 4WUU                                                                                                  |
| Angle of rotation (°)              | 36°                                        | 57°                                           | 138°                                  | 122°                                                                                                  |
| Total bonds                        | 115                                        | 114                                           | 167                                   | 183                                                                                                   |
| Peptide bonds<br><b>(bold ≥10)</b> | 4, 5, 6, <b>7, 8</b>                       | 1, 4, 5, 7, 8                                 | 1, 2, <b>4, 5</b> , 6, 7, <b>8, 9</b> | <b>1, 4</b>                                                                                           |
| Peptide bonds                      | 36 (31%)                                   | 16 (14%)                                      | 89 (53%)                              | 19 (10%)                                                                                              |
| Bonds from β/H                     | 21                                         | 10                                            | 47                                    | 10                                                                                                    |
| Bonds from α/L                     | 15                                         | 6                                             | 42                                    | 9                                                                                                     |
| HLA bonds                          | 79                                         | 98                                            | 78                                    | 164                                                                                                   |
| Bonds from β/H                     | 31                                         | 20                                            | 47                                    | 130                                                                                                   |
| Bonds from α/L                     | 48                                         | 78                                            | 31                                    | 34                                                                                                    |
| HLA ≥5 bonds<br><b>(bold ≥10)</b>  | <b>61, 65</b> , 72, 80,<br>146, <b>155</b> | 66, <b>154</b> , 155,<br><b>157, 158, 163</b> | <b>65</b> , 66, <b>72</b> , 73        | <b>58</b> , 62, <b>63</b> , 65,<br><b>66</b> , 155, 161,<br>162, <b>166, 167</b> ,<br><b>169, 170</b> |
| BSA                                |                                            |                                               |                                       |                                                                                                       |
| BSA total                          | 1173                                       | 1027                                          | 1366                                  | 1084                                                                                                  |
| BSA β/H pep                        | 253                                        | 158                                           | 256                                   | 72                                                                                                    |
| BSA α/L pep                        | 102                                        | 112                                           | 260                                   | 93                                                                                                    |
| BSA β/H HLA                        | 391                                        | 247                                           | 523                                   | 601                                                                                                   |
| BSA α/L HLA                        | 427                                        | 510                                           | 327                                   | 318                                                                                                   |

**Table S6. Structural comparison of H2-Fab–p53<sup>R175H</sup>/ HLA-A\*02:01 with various TCR and**

**Fab antibody-pHLA.** Total bonds were calculated using a 4 Å cutoff which includes both

hydrogen bonds and van der Waals interactions as calculated using CONTACTS in the CCP4

5 suite (74). PDB, Protein Data Bank; BSA, buried surface area; α, TCRα chain; β, TCRβ chain;

H, V<sub>H</sub> domain; L, V<sub>L</sub> domain; pep, HLA presented peptide.

| UniProt ID | Name                 | Peptide position | Sequence  | HLA-A*02:01 Affinity (nM) | %Rank |
|------------|----------------------|------------------|-----------|---------------------------|-------|
| NA         | p53 <sup>R175H</sup> | 168-176          | HMTEVVRHC | 5177.6                    | 9.7   |
| P52630     | STAT2                | 640-648          | PLTEIIRHY | 32385.4                   | 46.8  |
| Q96RL7     | VPS13A               | 2840-2848        | LQSEVIRHY | 21897.4                   | 27.6  |
| Q96NJ6     | ZFP3                 | 348-356          | QNSEIIRHI | 31174.4                   | 43.9  |

**Table S7. Putative cross-reactive peptides identified through positional peptide scanning. A**

binding motif of H2-scDb was determined by positional scanning of the p53<sup>R175H</sup>

HMTEVVRHC peptide. Three peptides that conformed to this motif in the UniProtKB human

5

protein database were identified using ScanProsite (45). NetMHCpan4.0 was used to predict the binding affinity and % rank of these peptides to HLA-A\*02:01 (25). The parental p53<sup>R175H</sup> target peptide is listed for comparison.

**Movie S1. Real-time live-cell analysis of H2-scDb induced T cell cytolysis of cancer cells**

Time-lapse imaging visualizing co-incubation of NucLight Green-labeled TYK-nu cells with 1 nM H2-scDb and T cells at an E:T ratio of 5:1. Representative phase contrast and green

5 fluorescence images were taken at 3-hour intervals for a total of 120 hours and merged for each time point.

## References and Notes

1. L. B. Alexandrov, S. Nik-Zainal, D. C. Wedge, S. A. Aparicio, S. Behjati, A. V. Biankin, G. R. Bignell, N. Bolli, A. Borg, A. L. Børresen-Dale, S. Boyault, B. Burkhardt, A. P. Butler, C. Caldas, H. R. Davies, C. Desmedt, R. Eils, J. E. Eyfjörd, J. A. Foekens, M. Greaves, F. Hosoda, B. Hutter, T. Ilicic, S. Imbeaud, M. Imielinski, N. Jäger, D. T. Jones, D. Jones, S. Knappskog, M. Kool, S. R. Lakhani, C. López-Otín, S. Martin, N. C. Munshi, H. Nakamura, P. A. Northcott, M. Pajic, E. Papaemmanuil, A. Paradiso, J. V. Pearson, X. S. Puente, K. Raine, M. Ramakrishna, A. L. Richardson, J. Richter, P. Rosenstiel, M. Schlesner, T. N. Schumacher, P. N. Span, J. W. Teague, Y. Totoki, A. N. Tutt, R. Valdés-Mas, M. M. van Buuren, L. van 't Veer, A. Vincent-Salomon, N. Waddell, L. R. Yates, J. Zucman-Rossi, P. A. Futreal, U. McDermott, P. Lichter, M. Meyerson, S. M. Grimmond, R. Siebert, E. Campo, T. Shibata, S. M. Pfister, P. J. Campbell, M. R. Stratton, Australian Pancreatic Cancer Genome Initiative, ICGC Breast Cancer Consortium, ICGC MMML-Seq Consortium, ICGC PedBrain, Signatures of mutational processes in human cancer. *Nature* **500**, 415–421 (2013).  
[doi:10.1038/nature12477](https://doi.org/10.1038/nature12477) [Medline](#)
2. B. Vogelstein, N. Papadopoulos, V. E. Velculescu, S. Zhou, L. A. Diaz Jr., K. W. Kinzler, Cancer genome landscapes. *Science* **339**, 1546–1558 (2013).  
[doi:10.1126/science.1235122](https://doi.org/10.1126/science.1235122) [Medline](#)
3. L. A. Garraway, E. S. Lander, Lessons from the cancer genome. *Cell* **153**, 17–37 (2013).  
[doi:10.1016/j.cell.2013.03.002](https://doi.org/10.1016/j.cell.2013.03.002) [Medline](#)
4. M. Gerstung, C. Jolly, I. Leshchiner, S. C. Dentro, S. Gonzalez, D. Rosebrock, T. J. Mitchell, Y. Rubanova, P. Anur, K. Yu, M. Tarabichi, A. Deshwar, J. Wintersinger, K. Kleinheinz, I. Vázquez-García, K. Haase, L. Jerman, S. Sengupta, G. Macintyre, S. Malikic, N. Donmez, D. G. Livitz, M. Cmero, J. Demeulemeester, S. Schumacher, Y. Fan, X. Yao, J. Lee, M. Schlesner, P. C. Boutros, D. D. Bowtell, H. Zhu, G. Getz, M. Imielinski, R. Beroukhim, S. C. Sahinalp, Y. Ji, M. Peifer, F. Markowetz, V. Mustonen, K. Yuan, W. Wang, Q. D. Morris, P. T. Spellman, D. C. Wedge, P. Van Loo, S. C. Sahinalp, Y. Ji, M. Peifer, F. Markowetz, V. Mustonen, K. Yuan, W. Wang, Q. D. Morris, P. T. Spellman, D. C. Wedge, P. Van Loo, PCAWG Evolution and Heterogeneity Working Group, PCAWG Consortium, The evolutionary history of 2,658 cancers. *Nature* **578**, 122–128 (2020). [doi:10.1038/s41586-019-1907-7](https://doi.org/10.1038/s41586-019-1907-7) [Medline](#)
5. L. Bouaoun, D. Sonkin, M. Ardin, M. Hollstein, G. Byrnes, J. Zavadil, M. Olivier, TP53 Variations in Human Cancers: New Lessons from the IARC TP53 Database and Genomics Data. *Hum. Mutat.* **37**, 865–876 (2016). [doi:10.1002/humu.23035](https://doi.org/10.1002/humu.23035) [Medline](#)
6. M. Hollstein, D. Sidransky, B. Vogelstein, C. C. Harris, p53 mutations in human cancers. *Science* **253**, 49–53 (1991). [doi:10.1126/science.1905840](https://doi.org/10.1126/science.1905840) [Medline](#)
7. P. Malekzadeh, A. Pasetto, P. F. Robbins, M. R. Parkhurst, B. C. Paria, L. Jia, J. J. Gartner, V. Hill, Z. Yu, N. P. Restifo, A. Sachs, E. Tran, W. Lo, R. P. Somerville, S. A. Rosenberg, D. C. Deniger, Neoantigen screening identifies broad TP53 mutant immunogenicity in patients with epithelial cancers. *J. Clin. Invest.* **129**, 1109–1114 (2019).  
[doi:10.1172/JCI123791](https://doi.org/10.1172/JCI123791) [Medline](#)

8. W. Lo, M. Parkhurst, P. F. Robbins, E. Tran, Y. C. Lu, L. Jia, J. J. Gartner, A. Pasetto, D. Deniger, P. Malekzadeh, T. E. Shelton, T. Prickett, S. Ray, S. Kivitz, B. C. Paria, I. Kriley, D. S. Schrupp, S. A. Rosenberg, Immunologic recognition of a shared p53 mutated neoantigen in a patient with metastatic colorectal cancer. *Cancer Immunol. Res.* **7**, 534–543 (2019). [doi:10.1158/2326-6066.CIR-18-0686](https://doi.org/10.1158/2326-6066.CIR-18-0686) [Medline](#)
9. R. L. Grossman, A. P. Heath, V. Ferretti, H. E. Varmus, D. R. Lowy, W. A. Kibbe, L. M. Staudt, Toward a shared vision for cancer genomic data. *N. Engl. J. Med.* **375**, 1109–1112 (2016). [doi:10.1056/NEJMp1607591](https://doi.org/10.1056/NEJMp1607591) [Medline](#)
10. F. F. González-Galarza, L. Y. Takeshita, E. J. Santos, F. Kempson, M. H. Maia, A. L. da Silva, A. L. Teles e Silva, G. S. Ghattaoraya, A. Alfirovic, A. R. Jones, D. Middleton, Allele frequency net 2015 update: New features for HLA epitopes, KIR and disease and HLA adverse drug reaction associations. *Nucleic Acids Res.* **43** (D1), D784–D788 (2015). [doi:10.1093/nar/gku1166](https://doi.org/10.1093/nar/gku1166) [Medline](#)
11. T. Dao, S. Yan, N. Veomett, D. Pankov, L. Zhou, T. Korontsvit, A. Scott, J. Whitten, P. Maslak, E. Casey, T. Tan, H. Liu, V. Zakhaleva, M. Curcio, E. Doubrovina, R. J. O'Reilly, C. Liu, D. A. Scheinberg, Targeting the intracellular WT1 oncogene product with a therapeutic human antibody. *Sci. Transl. Med.* **5**, 176ra33 (2013). [doi:10.1126/scitranslmed.3005661](https://doi.org/10.1126/scitranslmed.3005661) [Medline](#)
12. A. Y. Chang, T. Dao, R. S. Gejman, C. A. Jarvis, A. Scott, L. Dubrovsky, M. D. Mathias, T. Korontsvit, V. Zakhaleva, M. Curcio, R. C. Hendrickson, C. Liu, D. A. Scheinberg, A therapeutic T cell receptor mimic antibody targets tumor-associated PRAME peptide/HLA-I antigens. *J. Clin. Invest.* **127**, 2705–2718 (2017). [doi:10.1172/JCI92335](https://doi.org/10.1172/JCI92335) [Medline](#)
13. D. Li, C. Bentley, A. Anderson, S. Wiblin, K. L. S. Cleary, S. Koustoulidou, T. Hassanali, J. Yates, J. Greig, M. O. Nordkamp, I. Trenevskaja, N. Ternette, B. M. Kessler, B. Cornelissen, M. S. Cragg, A. H. Banham, Development of a T-cell receptor mimic antibody against wild-type p53 for cancer immunotherapy. *Cancer Res.* **77**, 2699–2711 (2017). [doi:10.1158/0008-5472.CAN-16-3247](https://doi.org/10.1158/0008-5472.CAN-16-3247) [Medline](#)
14. L. Low, A. Goh, J. Koh, S. Lim, C.-I. Wang, Targeting mutant p53-expressing tumours with a T cell receptor-like antibody specific for a wild-type antigen. *Nat. Commun.* **10**, 5382 (2019). [doi:10.1038/s41467-019-13305-z](https://doi.org/10.1038/s41467-019-13305-z) [Medline](#)
15. T. Dao, D. Pankov, A. Scott, T. Korontsvit, V. Zakhaleva, Y. Xu, J. Xiang, S. Yan, M. D. de Moraes Guerreiro, N. Veomett, L. Dubrovsky, M. Curcio, E. Doubrovina, V. Ponomarev, C. Liu, R. J. O'Reilly, D. A. Scheinberg, Therapeutic bispecific T-cell engager antibody targeting the intracellular oncoprotein WT1. *Nat. Biotechnol.* **33**, 1079–1086 (2015). [doi:10.1038/nbt.3349](https://doi.org/10.1038/nbt.3349) [Medline](#)
16. C. A. Klebanoff, S. A. Rosenberg, N. P. Restifo, Prospects for gene-engineered T cell immunotherapy for solid cancers. *Nat. Med.* **22**, 26–36 (2016). [doi:10.1038/nm.4015](https://doi.org/10.1038/nm.4015) [Medline](#)
17. S. Rafiq, T. J. Purdon, A. F. Daniyan, M. Koneru, T. Dao, C. Liu, D. A. Scheinberg, R. J. Brentjens, Optimized T-cell receptor-mimic chimeric antigen receptor T cells directed toward the intracellular Wilms Tumor 1 antigen. *Leukemia* **31**, 1788–1797 (2017). [doi:10.1038/leu.2016.373](https://doi.org/10.1038/leu.2016.373) [Medline](#)

18. S. L. Maude, N. Frey, P. A. Shaw, R. Aplenc, D. M. Barrett, N. J. Bunin, A. Chew, V. E. Gonzalez, Z. Zheng, S. F. Lacey, Y. D. Mahnke, J. J. Melenhorst, S. R. Rheingold, A. Shen, D. T. Teachey, B. L. Levine, C. H. June, D. L. Porter, S. A. Grupp, Chimeric antigen receptor T cells for sustained remissions in leukemia. *N. Engl. J. Med.* **371**, 1507–1517 (2014). [doi:10.1056/NEJMoa1407222](https://doi.org/10.1056/NEJMoa1407222) [Medline](#)
19. J. H. Park, I. Rivière, M. Gonen, X. Wang, B. Sénéchal, K. J. Curran, C. Sauter, Y. Wang, B. Santomasso, E. Mead, M. Roshal, P. Maslak, M. Davila, R. J. Brentjens, M. Sadelain, Long-Term Follow-up of CD19 CAR Therapy in acute lymphoblastic leukemia. *N. Engl. J. Med.* **378**, 449–459 (2018). [doi:10.1056/NEJMoa1709919](https://doi.org/10.1056/NEJMoa1709919) [Medline](#)
20. S. J. Schuster, M. R. Bishop, C. S. Tam, E. K. Waller, P. Borchmann, J. P. McGuirk, U. Jäger, S. Jaglowski, C. Andreadis, J. R. Westin, I. Fleury, V. Bachanova, S. R. Foley, P. J. Ho, S. Mielke, J. M. Magenau, H. Holte, S. Pantano, L. B. Pacaud, R. Awasthi, J. Chu, Ö. Anak, G. Salles, R. T. Maziarz; JULIET Investigators, Tisagenlecleucel in adult relapsed or refractory diffuse large B-cell lymphoma. *N. Engl. J. Med.* **380**, 45–56 (2019). [doi:10.1056/NEJMoa1804980](https://doi.org/10.1056/NEJMoa1804980) [Medline](#)
21. P. F. Robbins, S. H. Kassim, T. L. Tran, J. S. Crystal, R. A. Morgan, S. A. Feldman, J. C. Yang, M. E. Dudley, J. R. Wunderlich, R. M. Sherry, U. S. Kammula, M. S. Hughes, N. P. Restifo, M. Raffeld, C. C. Lee, Y. F. Li, M. El-Gamil, S. A. Rosenberg, A pilot trial using lymphocytes genetically engineered with an NY-ESO-1-reactive T-cell receptor: Long-term follow-up and correlates with response. *Clin. Cancer Res.* **21**, 1019–1027 (2015). [doi:10.1158/1078-0432.CCR-14-2708](https://doi.org/10.1158/1078-0432.CCR-14-2708) [Medline](#)
22. S. Rafiq, C. S. Hackett, R. J. Brentjens, Engineering strategies to overcome the current roadblocks in CAR T cell therapy. *Nat. Rev. Clin. Oncol.* **17**, 147–167 (2020). [doi:10.1038/s41571-019-0297-y](https://doi.org/10.1038/s41571-019-0297-y) [Medline](#)
23. A. F. Labrijn, M. L. Janmaat, J. M. Reichert, P. W. H. I. Parren, Bispecific antibodies: A mechanistic review of the pipeline. *Nat. Rev. Drug Discov.* **18**, 585–608 (2019). [doi:10.1038/s41573-019-0028-1](https://doi.org/10.1038/s41573-019-0028-1) [Medline](#)
24. H. Kantarjian, A. Stein, N. Gökbuget, A. K. Fielding, A. C. Schuh, J.-M. Ribera, A. Wei, H. Dombret, R. Foà, R. Bassan, Ö. Arslan, M. A. Sanz, J. Bergeron, F. Demirkan, E. Lech-Maranda, A. Rambaldi, X. Thomas, H.-A. Horst, M. Brüggemann, W. Klapper, B. L. Wood, A. Fleishman, D. Nagorsen, C. Holland, Z. Zimmerman, M. S. Topp, Blinatumomab versus chemotherapy for advanced acute lymphoblastic leukemia. *N. Engl. J. Med.* **376**, 836–847 (2017). [doi:10.1056/NEJMoa1609783](https://doi.org/10.1056/NEJMoa1609783) [Medline](#)
25. M. Andreatta, M. Nielsen, Gapped sequence alignment using artificial neural networks: Application to the MHC class I system. *Bioinformatics* **32**, 511–517 (2016). [doi:10.1093/bioinformatics/btv639](https://doi.org/10.1093/bioinformatics/btv639) [Medline](#)
26. M. R. Parkhurst, P. F. Robbins, E. Tran, T. D. Prickett, J. J. Gartner, L. Jia, G. Ivey, Y. F. Li, M. El-Gamil, A. Lalani, J. S. Crystal, A. Sachs, E. Groh, S. Ray, L. T. Ngo, S. Kivitz, A. Pasetto, R. Yossef, F. J. Lowery, S. L. Goff, W. Lo, G. Cafri, D. C. Deniger, P. Malekzadeh, M. Ahmadzadeh, J. R. Wunderlich, R. P. T. Somerville, S. A. Rosenberg, Unique neoantigens arise from somatic mutations in patients with gastrointestinal cancers. *Cancer Discov.* **9**, 1022–1035 (2019). [doi:10.1158/2159-8290.CD-18-1494](https://doi.org/10.1158/2159-8290.CD-18-1494) [Medline](#)

27. Q. Wang, J. Douglass, M. S. Hwang, E. H. Hsiue, B. J. Mog, M. Zhang, N. Papadopoulos, K. W. Kinzler, S. Zhou, B. Vogelstein, Direct detection and quantification of neoantigens. *Cancer Immunol. Res.* **7**, 1748–1754 (2019). [doi:10.1158/2326-6066.CIR-19-0107](https://doi.org/10.1158/2326-6066.CIR-19-0107) [Medline](#)
28. M. S. Miller, J. Douglass, M. S. Hwang, A. D. Skora, M. Murphy, N. Papadopoulos, K. W. Kinzler, B. Vogelstein, S. Zhou, S. B. Gabelli, An engineered antibody fragment targeting mutant  $\beta$ -catenin via major histocompatibility complex I neoantigen presentation. *J. Biol. Chem.* **294**, 19322–19334 (2019). [doi:10.1074/jbc.RA119.010251](https://doi.org/10.1074/jbc.RA119.010251) [Medline](#)
29. J. Douglass, E. H.-C. Hsiue, B. J. Mog, M. S. Hwang, S. R. DiNapoli, A. H. Pearlman, M. S. Miller, K. M. Wright, P. A. Azurmendi, Q. Wang, S. Paul, A. Schaefer, A. D. Skora, M. Dal Molin, M. F. Konig, Q. Liu, E. Watson, Y. Li, M. B. Murphy, D. M. Pardoll, C. Bettgowda, N. Papadopoulos, S. B. Gabelli, K. W. Kinzler, B. Vogelstein, S. Zhou, Bispecific antibodies targeting mutant, neoantigens. *Sci. Immunol.* **6**, eabd5515 (2021).
30. S. Paul, A. H. Pearlman, J. Douglass, B. J. Mog, E. H.-C. Hsiue, M. S. Hwang, S. R. DiNapoli, M. F. Konig, P. A. Brown, K. M. Wright, S. Sur, S. B. Gabelli, Y. Li, G. Ghiaur, D. Pardoll, N. Papadopoulos, C. Bettgowda, K. W. Kinzler, S. Zhou, B. Vogelstein, TCR beta chain-directed bispecific antibodies for the treatment of T cell cancers. *Sci. Transl. Med.* 10.1126/scitranslmed.abd3595 (2021).
31. H. Wu, D. G. Myszka, S. W. Tendian, C. G. Brouillette, R. W. Sweet, I. M. Chaiken, W. A. Hendrickson, Kinetic and structural analysis of mutant CD4 receptors that are defective in HIV gp120 binding. *Proc. Natl. Acad. Sci. U.S.A.* **93**, 15030–15035 (1996). [doi:10.1073/pnas.93.26.15030](https://doi.org/10.1073/pnas.93.26.15030) [Medline](#)
32. P. C. Beverley, R. E. Callard, Distinctive functional characteristics of human “T” lymphocytes defined by E rosetting or a monoclonal anti-T cell antibody. *Eur. J. Immunol.* **11**, 329–334 (1981). [doi:10.1002/eji.1830110412](https://doi.org/10.1002/eji.1830110412) [Medline](#)
33. Z. Zhu, G. D. Lewis, P. Carter, Engineering high affinity humanized anti-p185HER2/anti-CD3 bispecific F(ab')<sub>2</sub> for efficient lysis of p185HER2 overexpressing tumor cells. *Int. J. Cancer* **62**, 319–324 (1995). [doi:10.1002/ijc.2910620315](https://doi.org/10.1002/ijc.2910620315) [Medline](#)
34. T. Dreier, G. Lorenczewski, C. Brandl, P. Hoffmann, U. Syring, F. Hanakam, P. Kufer, G. Riethmuller, R. Bargou, P. A. Baeuerle, Extremely potent, rapid and costimulation-independent cytotoxic T-cell response against lymphoma cells catalyzed by a single-chain bispecific antibody. *Int. J. Cancer* **100**, 690–697 (2002). [doi:10.1002/ijc.10557](https://doi.org/10.1002/ijc.10557) [Medline](#)
35. J. P. Van Wauwe, J. R. De Mey, J. G. Goossens, OKT3: A monoclonal anti-human T lymphocyte antibody with potent mitogenic properties. *J. Immunol.* **124**, 2708–2713 (1980). [Medline](#)
36. L. Huang, L. S. Johnson, CD3-binding molecules capable of binding to human and non-human CD3. *Macrogenics* (2014).
37. E. Krissinel, K. Henrick, Inference of macromolecular assemblies from crystalline state. *J. Mol. Biol.* **372**, 774–797 (2007). [doi:10.1016/j.jmb.2007.05.022](https://doi.org/10.1016/j.jmb.2007.05.022) [Medline](#)



38. S. Sarkizova, S. Klaeger, P. M. Le, L. W. Li, G. Oliveira, H. Keshishian, C. R. Hartigan, W. Zhang, D. A. Braun, K. L. Ligon, P. Bachiredy, I. K. Zervantonakis, J. M. Rosenbluth, T. Ouspenskaia, T. Law, S. Justesen, J. Stevens, W. J. Lane, T. Eisenhaure, G. Lan Zhang, K. R. Clauser, N. Hacohen, S. A. Carr, C. J. Wu, D. B. Keskin, A large peptidome dataset improves HLA class I epitope prediction across most of the human population. *Nat. Biotechnol.* **38**, 199–209 (2020). [doi:10.1038/s41587-019-0322-9](https://doi.org/10.1038/s41587-019-0322-9) [Medline](#)
39. A. I. Webb, M. A. Dunstone, W. Chen, M. I. Aguilar, Q. Chen, H. Jackson, L. Chang, L. Kjer-Nielsen, T. Beddoe, J. McCluskey, J. Rossjohn, A. W. Purcell, Functional and structural characteristics of NY-ESO-1-related HLA A2-restricted epitopes and the design of a novel immunogenic analogue. *J. Biol. Chem.* **279**, 23438–23446 (2004). [doi:10.1074/jbc.M314066200](https://doi.org/10.1074/jbc.M314066200) [Medline](#)
40. N. Ataie, J. Xiang, N. Cheng, E. J. Brea, W. Lu, D. A. Scheinberg, C. Liu, H. L. Ng, Structure of a TCR-mimic antibody with target predicts pharmacogenetics. *J. Mol. Biol.* **428**, 194–205 (2016). [doi:10.1016/j.jmb.2015.12.002](https://doi.org/10.1016/j.jmb.2015.12.002) [Medline](#)
41. R. S. Gejman, H. F. Jones, M. G. Klatt, A. Y. Chang, C. Y. Oh, S. S. Chandran, T. Korontsvit, V. Zakahleva, T. Dao, C. A. Klebanoff, D. A. Scheinberg, Identification of the targets of T-cell receptor therapeutic agents and cells by use of a high-throughput genetic platform. *Cancer Immunol. Res.* **8**, 672–684 (2020). [doi:10.1158/2326-6066.CIR-19-0745](https://doi.org/10.1158/2326-6066.CIR-19-0745) [Medline](#)
42. T. Kula, M. H. Dezfulian, C. I. Wang, N. S. Abdelfattah, Z. C. Hartman, K. W. Wucherpennig, H. K. Lyerly, S. J. Elledge, T-Scan: A genome-wide method for the systematic discovery of T cell epitopes. *Cell* **178**, 1016–1028.e13 (2019). [doi:10.1016/j.cell.2019.07.009](https://doi.org/10.1016/j.cell.2019.07.009) [Medline](#)
43. C. H. Coles, R. M. Mulvaney, S. Malla, A. Walker, K. J. Smith, A. Lloyd, K. L. Lowe, M. L. McCully, R. Martinez Hague, M. Aleksic, J. Harper, S. J. Paston, Z. Donnellan, F. Chester, K. Wiederhold, R. A. Robinson, A. Knox, A. R. Stacey, J. Dukes, E. Baston, S. Griffin, B. K. Jakobsen, A. Vuidepot, S. Harper, TCRs with distinct specificity profiles use different binding modes to engage an identical peptide-HLA complex. *J. Immunol.* **204**, 1943–1953 (2020). [doi:10.4049/jimmunol.1900915](https://doi.org/10.4049/jimmunol.1900915) [Medline](#)
44. J. Harper, K. J. Adams, G. Bossi, D. E. Wright, A. R. Stacey, N. Bedke, R. Martinez-Hague, D. Blat, L. Humbert, H. Buchanan, G. S. Le Provost, Z. Donnellan, R. J. Carreira, S. J. Paston, L. U. Weigand, M. Canestraro, J. P. Sanderson, S. Botta Gordon-Smith, K. L. Lowe, K. A. Rygiel, A. S. Powlesland, A. Vuidepot, N. J. Hassan, B. J. Cameron, B. K. Jakobsen, J. Dukes, An approved in vitro approach to preclinical safety and efficacy evaluation of engineered T cell receptor anti-CD3 bispecific (ImmTAC) molecules. *PLOS ONE* **13**, e0205491 (2018). [doi:10.1371/journal.pone.0205491](https://doi.org/10.1371/journal.pone.0205491) [Medline](#)
45. E. de Castro, C. J. Sigrist, A. Gattiker, V. Bulliard, P. S. Langendijk-Genevaux, E. Gasteiger, A. Bairoch, N. Hulo, ScanProsite: Detection of PROSITE signature matches and ProRule-associated functional and structural residues in proteins. *Nucleic Acids Res.* **34**, W362–5 (2006). [doi:10.1093/nar/gkl124](https://doi.org/10.1093/nar/gkl124) [Medline](#)
46. G. Stewart-Jones, A. Wadle, A. Hombach, E. Shenderov, G. Held, E. Fischer, S. Kleber, N. Nuber, F. Stenner-Liewen, S. Bauer, A. McMichael, A. Knuth, H. Abken, A. A. Hombach, V. Cerundolo, E. Y. Jones, C. Renner, Rational development of high-affinity

- T-cell receptor-like antibodies. *Proc. Natl. Acad. Sci. U.S.A.* **106**, 5784–5788 (2009). [doi:10.1073/pnas.0901425106](https://doi.org/10.1073/pnas.0901425106) [Medline](#)
47. M. C. Raman, P. J. Rizkallah, R. Simmons, Z. Donnellan, J. Dukes, G. Bossi, G. S. Le Provost, P. Todorov, E. Baston, E. Hickman, T. Mahon, N. Hassan, A. Vuidepot, M. Sami, D. K. Cole, B. K. Jakobsen, Direct molecular mimicry enables off-target cardiovascular toxicity by an enhanced affinity TCR designed for cancer immunotherapy. *Sci. Rep.* **6**, 18851 (2016). [doi:10.1038/srep18851](https://doi.org/10.1038/srep18851) [Medline](#)
48. N. Liddy, G. Bossi, K. J. Adams, A. Lissina, T. M. Mahon, N. J. Hassan, J. Gavarret, F. C. Bianchi, N. J. Pumphrey, K. Ladell, E. Gostick, A. K. Sewell, N. M. Lissin, N. E. Harwood, P. E. Molloy, Y. Li, B. J. Cameron, M. Sami, E. E. Baston, P. T. Todorov, S. J. Paston, R. E. Dennis, J. V. Harper, S. M. Dunn, R. Ashfield, A. Johnson, Y. McGrath, G. Plesa, C. H. June, M. Kalos, D. A. Price, A. Vuidepot, D. D. Williams, D. H. Sutton, B. K. Jakobsen, Monoclonal TCR-redirectioned tumor cell killing. *Nat. Med.* **18**, 980–987 (2012). [doi:10.1038/nm.2764](https://doi.org/10.1038/nm.2764) [Medline](#)
49. M. A. Purbhoo, D. J. Irvine, J. B. Huppa, M. M. Davis, T cell killing does not require the formation of a stable mature immunological synapse. *Nat. Immunol.* **5**, 524–530 (2004). [doi:10.1038/ni1058](https://doi.org/10.1038/ni1058) [Medline](#)
50. J. D. Stone, D. H. Aggen, A. Schietinger, H. Schreiber, D. M. Kranz, A sensitivity scale for targeting T cells with chimeric antigen receptors (CARs) and bispecific T-cell Engagers (BiTEs). *OncoImmunology* **1**, 863–873 (2012). [doi:10.4161/onci.20592](https://doi.org/10.4161/onci.20592) [Medline](#)
51. G. P. Dunn, C. M. Koebel, R. D. Schreiber, Interferons, immunity and cancer immunoediting. *Nat. Rev. Immunol.* **6**, 836–848 (2006). [doi:10.1038/nri1961](https://doi.org/10.1038/nri1961) [Medline](#)
52. B. J. Cameron, A. B. Gerry, J. Dukes, J. V. Harper, V. Kannan, F. C. Bianchi, F. Grand, J. E. Brewer, M. Gupta, G. Plesa, G. Bossi, A. Vuidepot, A. S. Powlesland, A. Legg, K. J. Adams, A. D. Bennett, N. J. Pumphrey, D. D. Williams, G. Binder-Scholl, I. Kulikovskaya, B. L. Levine, J. L. Riley, A. Varela-Rohena, E. A. Stadtmauer, A. P. Rapoport, G. P. Linette, C. H. June, N. J. Hassan, M. Kalos, B. K. Jakobsen, Identification of a Titin-derived HLA-A1-presented peptide as a cross-reactive target for engineered MAGE A3-directed T cells. *Sci. Transl. Med.* **5**, 197ra103 (2013). [doi:10.1126/scitranslmed.3006034](https://doi.org/10.1126/scitranslmed.3006034) [Medline](#)
53. R. A. Morgan, N. Chinnasamy, D. Abate-Daga, A. Gros, P. F. Robbins, Z. Zheng, M. E. Dudley, S. A. Feldman, J. C. Yang, R. M. Sherry, G. Q. Phan, M. S. Hughes, U. S. Kammula, A. D. Miller, C. J. Hessman, A. A. Stewart, N. P. Restifo, M. M. Quezado, M. Alimchandani, A. Z. Rosenberg, A. Nath, T. Wang, B. Bielekova, S. C. Wuest, N. Akula, F. J. McMahon, S. Wilde, B. Mosetter, D. J. Schendel, C. M. Laurencot, S. A. Rosenberg, Cancer regression and neurological toxicity following anti-MAGE-A3 TCR gene therapy. *J. Immunother.* **36**, 133–151 (2013). [doi:10.1097/CJI.0b013e3182829903](https://doi.org/10.1097/CJI.0b013e3182829903) [Medline](#)
54. A. G. Chapuis, D. N. Egan, M. Bar, T. M. Schmitt, M. S. McAfee, K. G. Paulson, V. Voillet, R. Gottardo, G. B. Ragnarsson, M. Bleakley, C. C. Yeung, P. Muhlhauser, H. N. Nguyen, L. A. Kropp, L. Castelli, F. Wagener, D. Hunter, M. Lindberg, K. Cohen, A. Seese, M. J. McElrath, N. Duerkopp, T. A. Gooley, P. D. Greenberg, T cell receptor gene therapy

- targeting WT1 prevents acute myeloid leukemia relapse post-transplant. *Nat. Med.* **25**, 1064–1072 (2019). [doi:10.1038/s41591-019-0472-9](https://doi.org/10.1038/s41591-019-0472-9) [Medline](#)
55. E. Tran, P. F. Robbins, Y. C. Lu, T. D. Prickett, J. J. Gartner, L. Jia, A. Pasetto, Z. Zheng, S. Ray, E. M. Groh, I. R. Kriley, S. A. Rosenberg, T-cell transfer therapy targeting mutant KRAS in cancer. *N. Engl. J. Med.* **375**, 2255–2262 (2016). [doi:10.1056/NEJMoa1609279](https://doi.org/10.1056/NEJMoa1609279) [Medline](#)
56. M. E. Goebeler, R. C. Bargou, T cell-engaging therapies - BiTEs and beyond. *Nat. Rev. Clin. Oncol.* **17**, 418–434 (2020). [doi:10.1038/s41571-020-0347-5](https://doi.org/10.1038/s41571-020-0347-5) [Medline](#)
57. W. A. Jefferies, G. G. MacPherson, Expression of the W6/32 HLA epitope by cells of rat, mouse, human and other species: Critical dependence on the interaction of specific MHC heavy chains with human or bovine beta 2-microglobulin. *Eur. J. Immunol.* **17**, 1257–1263 (1987). [doi:10.1002/eji.1830170907](https://doi.org/10.1002/eji.1830170907) [Medline](#)
58. A. D. Skora, J. Douglass, M. S. Hwang, A. J. Tam, R. L. Blosser, S. B. Gabelli, J. Cao, L. A. Diaz Jr., N. Papadopoulos, K. W. Kinzler, B. Vogelstein, S. Zhou, Generation of MANAbodies specific to HLA-restricted epitopes encoded by somatically mutated genes. *Proc. Natl. Acad. Sci. U.S.A.* **112**, 9967–9972 (2015). [doi:10.1073/pnas.1511996112](https://doi.org/10.1073/pnas.1511996112) [Medline](#)
59. Y. Huang, B. Niu, Y. Gao, L. Fu, W. Li, CD-HIT Suite: A web server for clustering and comparing biological sequences. *Bioinformatics* **26**, 680–682 (2010). [doi:10.1093/bioinformatics/btq003](https://doi.org/10.1093/bioinformatics/btq003) [Medline](#)
60. D. G. Myszka, Improving biosensor analysis. *J. Mol. Recognit.* **12**, 279–284 (1999). [doi:10.1002/\(SICI\)1099-1352\(199909/10\)12:5<279:AID-JMR473>3.0.CO;2-3](https://doi.org/10.1002/(SICI)1099-1352(199909/10)12:5<279:AID-JMR473>3.0.CO;2-3) [Medline](#)
61. F. H. Niesen, H. Berglund, M. Vedadi, The use of differential scanning fluorimetry to detect ligand interactions that promote protein stability. *Nat. Protoc.* **2**, 2212–2221 (2007). [doi:10.1038/nprot.2007.321](https://doi.org/10.1038/nprot.2007.321) [Medline](#)
62. U. B. Ericsson, B. M. Hallberg, G. T. Detitta, N. Dekker, P. Nordlund, Thermofluor-based high-throughput stability optimization of proteins for structural studies. *Anal. Biochem.* **357**, 289–298 (2006). [doi:10.1016/j.ab.2006.07.027](https://doi.org/10.1016/j.ab.2006.07.027) [Medline](#)
63. M. Cheng, B. H. Santich, H. Xu, M. Ahmed, M. Huse, N. K. Cheung, Successful engineering of a highly potent single-chain variable-fragment (scFv) bispecific antibody to target disialoganglioside (GD2) positive tumors. *OncoImmunology* **5**, e1168557 (2016). [doi:10.1080/2162402X.2016.1168557](https://doi.org/10.1080/2162402X.2016.1168557) [Medline](#)
64. J. D. Altman, M. M. Davis, MHC-peptide tetramers to visualize antigen-specific T cells. *Curr. Protoc. Immunol.* **115**, 17.13.11–17.13, 44 (2016). [doi:10.1002/cpim.14](https://doi.org/10.1002/cpim.14) [Medline](#)
65. D. N. Garboczi, D. T. Hung, D. C. Wiley, HLA-A2-peptide complexes: Refolding and crystallization of molecules expressed in *Escherichia coli* and complexed with single antigenic peptides. *Proc. Natl. Acad. Sci. U.S.A.* **89**, 3429–3433 (1992). [doi:10.1073/pnas.89.8.3429](https://doi.org/10.1073/pnas.89.8.3429) [Medline](#)
66. F. W. Studier, Protein production by auto-induction in high density shaking cultures. *Protein Expr. Purif.* **41**, 207–234 (2005). [doi:10.1016/j.pep.2005.01.016](https://doi.org/10.1016/j.pep.2005.01.016) [Medline](#)

67. G. Winter, K. E. McAuley, Automated data collection for macromolecular crystallography. *Methods* **55**, 81–93 (2011). [doi:10.1016/j.ymeth.2011.06.010](https://doi.org/10.1016/j.ymeth.2011.06.010) [Medline](#)
68. W. Kabsch, Xds. *Acta Crystallogr. D Biol. Crystallogr.* **66**, 125–132 (2010). [doi:10.1107/S0907444909047337](https://doi.org/10.1107/S0907444909047337) [Medline](#)
69. P. R. Evans, G. N. Murshudov, How good are my data and what is the resolution? *Acta Crystallogr. D Biol. Crystallogr.* **69**, 1204–1214 (2013). [doi:10.1107/S0907444913000061](https://doi.org/10.1107/S0907444913000061) [Medline](#)
70. A. J. McCoy, R. W. Grosse-Kunstleve, P. D. Adams, M. D. Winn, L. C. Storoni, R. J. Read, Phaser crystallographic software. *J. Appl. Crystallogr.* **40**, 658–674 (2007). [doi:10.1107/S0021889807021206](https://doi.org/10.1107/S0021889807021206) [Medline](#)
71. M. Mishto, A. Mansurkhodzhaev, G. Ying, A. Bitra, R. A. Cordfunke, S. Henze, D. Paul, J. Sidney, H. Urlaub, J. Neefjes, A. Sette, D. M. Zajonc, J. Liepe, An in silico–in vitro pipeline identifying an HLA-A\*02:01<sup>+</sup> KRAS G12V<sup>+</sup> spliced epitope candidate for a broad tumor-immune response in cancer patients. *Front. Immunol.* **10**, 2572 (2019). [doi:10.3389/fimmu.2019.02572](https://doi.org/10.3389/fimmu.2019.02572) [Medline](#)
72. M. D. Winn, C. C. Ballard, K. D. Cowtan, E. J. Dodson, P. Emsley, P. R. Evans, R. M. Keegan, E. B. Krissinel, A. G. Leslie, A. McCoy, S. J. McNicholas, G. N. Murshudov, N. S. Pannu, E. A. Potterton, H. R. Powell, R. J. Read, A. Vagin, K. S. Wilson, Overview of the CCP4 suite and current developments. *Acta Crystallogr. D Biol. Crystallogr.* **67**, 235–242 (2011). [doi:10.1107/S0907444910045749](https://doi.org/10.1107/S0907444910045749) [Medline](#)
73. G. N. Murshudov, A. A. Vagin, E. J. Dodson, Refinement of macromolecular structures by the maximum-likelihood method. *Acta Crystallogr. D Biol. Crystallogr.* **53**, 240–255 (1997). [doi:10.1107/S0907444996012255](https://doi.org/10.1107/S0907444996012255) [Medline](#)
74. P. Emsley, B. Lohkamp, W. G. Scott, K. Cowtan, Features and development of Coot. *Acta Crystallogr. D Biol. Crystallogr.* **66**, 486–501 (2010). [doi:10.1107/S0907444910007493](https://doi.org/10.1107/S0907444910007493) [Medline](#)
75. R. Gowthaman, B. G. Pierce, TCR3d: The T cell receptor structural repertoire database. *Bioinformatics* **35**, 5323–5325 (2019). [doi:10.1093/bioinformatics/btz517](https://doi.org/10.1093/bioinformatics/btz517) [Medline](#)
76. B. G. Pierce, Z. Weng, A flexible docking approach for prediction of T cell receptor-peptide-MHC complexes. *Protein Sci.* **22**, 35–46 (2013). [doi:10.1002/pro.2181](https://doi.org/10.1002/pro.2181) [Medline](#)
77. N. Yoshiya, S. Adachi, Y. Misawa, H. Yuzawa, T. Honda, K. Kanazawa, K. Takeuchi S Tanaka, K. Tanaka, [Isolation of cisplatin-resistant subline from human ovarian cancer cell line and analysis of its cell-biological characteristics]. *Nippon Sanka Fujinka Gakkai Zasshi* **41**, 7–14 (1989). [Medline](#)
78. P. J. Miller, Y. Pazy, B. Conti, D. Riddle, E. Appella, E. J. Collins, Single MHC mutation eliminates enthalpy associated with T cell receptor binding. *J. Mol. Biol.* **373**, 315–327 (2007). [doi:10.1016/j.jmb.2007.07.028](https://doi.org/10.1016/j.jmb.2007.07.028) [Medline](#)
79. H. W. Nijman, J. G. Houbiers, M. P. Vierboom, S. H. van der Burg, J. W. Drijfhout, J. D'Amato, P. Kenemans, C. J. Melief, W. M. Kast, Identification of peptide sequences that potentially trigger HLA-A2.1-restricted cytotoxic T lymphocytes. *Eur. J. Immunol.* **23**, 1215–1219 (1993). [doi:10.1002/eji.1830230603](https://doi.org/10.1002/eji.1830230603) [Medline](#)

80. Q. Li, D. Hapka, H. Chen, D. A. Vallera, C. R. Wagner, Self-assembly of antibodies by chemical induction. *Angew. Chem. Int. Ed.* **47**, 10179–10182 (2008). [doi:10.1002/anie.200803507](https://doi.org/10.1002/anie.200803507) [Medline](#)
81. T. T. Junttila, J. Li, J. Johnston, M. Hristopoulos, R. Clark, D. Ellerman, B.-E. Wang, Y. Li, M. Mathieu, G. Li, J. Young, E. Luis, G. Lewis Phillips, E. Stefanich, C. Spiess, A. Polson, B. Irving, J. M. Scheer, M. R. Junttila, M. S. Dennis, R. Kelley, K. Totpal, A. Ebens, Antitumor efficacy of a bispecific antibody that targets HER2 and activates T cells. *Cancer Res.* **74**, 5561–5571 (2014). [doi:10.1158/0008-5472.CAN-13-3622-T](https://doi.org/10.1158/0008-5472.CAN-13-3622-T) [Medline](#)
82. U. Reusch, J. Duell, K. Ellwanger, C. Herbrecht, S. H. J. Knackmuss, I. Fucek, M. Eser, F. McAleese, V. Molkenhain, F. L. Gall, M. Topp, M. Little, E. A. Zhukovsky, A tetravalent bispecific TandAb (CD19/CD3), AFM11, efficiently recruits T cells for the potent lysis of CD19<sup>+</sup> tumor cells. *MAbs* **7**, 584–604 (2015). [doi:10.1080/19420862.2015.1029216](https://doi.org/10.1080/19420862.2015.1029216) [Medline](#)
83. L. Kjer-Nielsen, M. A. Dunstone, L. Kostenko, L. K. Ely, T. Beddoe, N. A. Mifsud, A. W. Purcell, A. G. Brooks, J. McCluskey, J. Rossjohn, Crystal structure of the human T cell receptor CD3 epsilon gamma heterodimer complexed to the therapeutic mAb OKT3. *Proc. Natl. Acad. Sci. U.S.A.* **101**, 7675–7680 (2004). [doi:10.1073/pnas.0402295101](https://doi.org/10.1073/pnas.0402295101) [Medline](#)
84. L. Liu, C. K. Lam, V. Long, L. Widjaja, Y. Yang, H. Li, L. Jin, S. Burke, S. Gorlatov, J. Brown, R. Alderson, M. D. Lewis, J. L. Nordstrom, S. Koenig, P. A. Moore, S. Johnson, E. Bonvini, MGD011, A CD19 x CD3 dual-affinity retargeting bi-specific molecule incorporating extended circulating half-life for the treatment of B-cell malignancies. *Clin. Cancer Res.* **23**, 1506–1518 (2017). [doi:10.1158/1078-0432.CCR-16-0666](https://doi.org/10.1158/1078-0432.CCR-16-0666) [Medline](#)
